# Supplementary material for: Diversity of migratory birds in Ottu lake, Sirsa, Haryana, India.
Source: Royal Society of Chemistry journal article supplement (doi:10.1039/c8cp03720e), 2014-01-01
Supplement: c8cp03720e1.pdf [file c8cp03720e1.pdf]

Supporting information for :

The S<sub>2</sub> to S<sub>3</sub> transition for water oxidation in PSII, revisited

Per E.M. Siegbahn

Department of Organic Chemistry, Arrhenius Laboratory, Stockholm  
University, SE-106 91, Stockholm, Sweden.

Structure used in Fig 2:

|     |                |                |                |
|-----|----------------|----------------|----------------|
| Mn1 | 2.9193906020   | -1.4738485819  | 3.9825341119   |
| Mn2 | 4.5826895172   | -1.4861877807  | 8.5910689182   |
| Mn3 | 5.2752860959   | -1.5042974903  | 5.4296551351   |
| Mn4 | 6.6136295738   | -0.0062346936  | 7.3854716020   |
| O5  | 3.6216224357   | -1.2409404138  | 5.9625148152   |
| O6  | 5.7873113763   | 0.2383190330   | 5.8312073761   |
| O7  | 5.0735708607   | 0.2856416265   | 8.3304580202   |
| O8  | 6.0208999902   | -1.8019682407  | 7.3566846824   |
| Ca9 | 3.5215304922   | 1.2830362152   | 6.7029448443   |
| C10 | 0.6675458207#  | 1.9515082728#  | 1.7063477712#  |
| H11 | 1.2251835676#  | 1.9058029976#  | 0.7825776899#  |
| H12 | -0.3243896157# | 2.3686419264#  | 1.6143240628#  |
| H13 | 0.4692471165   | 0.8992471996   | 1.9498422634   |
| C14 | 1.4686503770   | 2.5195836221   | 2.8939531182   |
| H15 | 0.7699763700   | 2.8542874497   | 3.6725809784   |
| H16 | 2.0625004549   | 3.4003131080   | 2.6244442449   |
| C17 | 2.4203589741   | 1.5639935891   | 3.6535524865   |
| O18 | 3.2353366622   | 2.0713051810   | 4.4614451928   |
| O19 | 2.2614573916   | 0.3071761117   | 3.4516579243   |
| C20 | 1.0582598993#  | 1.1829961916#  | 13.4563132601# |
| H21 | 0.3702238917#  | 0.3601390915#  | 13.5824630076# |
| H22 | 0.7336467781#  | 2.1291270652#  | 13.8635786709# |
| H23 | 1.9550687323   | 0.9063826392   | 14.0307429557  |
| C24 | 1.4408876838   | 1.2880372151   | 11.9657482337  |
| H25 | 2.2383435593   | 2.0295817588   | 11.8316177987  |
| H26 | 0.5882154879   | 1.6376952246   | 11.3712401546  |
| C27 | 1.9137503829   | -0.0718959843  | 11.4351690792  |
| H28 | 1.0845713658   | -0.7946611659  | 11.4448578134  |
| H29 | 2.6790888868   | -0.4972543407  | 12.0974010684  |
| C30 | 2.4962505102   | -0.0905425548  | 10.0271313267  |
| O31 | 2.3860817715   | 0.8470470411   | 9.2338236463   |
| O32 | 3.1142541593   | -1.2135063696  | 9.7456539462   |
| C33 | 2.7844501175#  | -7.8608079453# | 8.6257439092#  |
| H34 | 2.4776268182   | -8.8291531155  | 9.0416621883   |
| H35 | 1.9522180282   | -7.4821096359  | 8.0247958754   |
| C36 | 4.0184199228   | -8.0828536784  | 7.7463652526   |
| O37 | 5.1484016583   | -8.2675005017  | 8.2503216207   |
| C38 | 3.0874058389   | -6.9060388384  | 9.8144367371   |
| H39 | 3.7874761493   | -7.4045343675  | 10.4956973289  |
| H40 | 2.1636445932   | -6.7249185100  | 10.3714121288  |
| C41 | 3.6667690446   | -5.5940038275  | 9.3715244409   |
| N42 | 4.8371640526   | -5.5964099890  | 8.6260376173   |
| H43 | 5.3442903685   | -6.4588834955  | 8.4038503443   |
| C44 | 3.2803262952   | -4.2757223275  | 9.4194322473   |
| H45 | 2.4339045578   | -3.8147795417  | 9.9029458608   |
| C46 | 5.0840801167   | -4.3550369056  | 8.1970219770   |
| H47 | 5.8474280975   | -4.0932779934  | 7.4901767482   |
| N48 | 4.1775139634   | -3.5133052967  | 8.6805791017   |
| N49 | 3.8178157755   | -7.9513824874  | 6.4246691399   |
| H50 | 2.8660350496   | -7.7278956144  | 6.1010279750   |
| C51 | 4.9172533146#  | -7.8463448393# | 5.4688658904#  |
| H52 | 4.6217784186   | -8.3779095722  | 4.5556443456   |
| H53 | 5.7811975425   | -8.3588726801  | 5.8966953883   |
| C54 | 5.2813527725   | -6.3774065647  | 5.1307404967   |
| H55 | 6.1406374935   | -6.3852425522  | 4.4470664528   |
| H56 | 5.6312835058   | -5.8926662446  | 6.0452635283   |
| C57 | 4.1253006146   | -5.5647001456  | 4.5183676763   |
| H58 | 3.1617376616   | -5.8533220837  | 4.9565515293   |
| H59 | 4.0163870294   | -5.7629500648  | 3.4443354005   |
| C60 | 4.1853357693   | -4.0484280255  | 4.6591383592   |
| O61 | 3.1855681962   | -3.4270283852  | 4.1926734867   |
| O62 | 5.1690863722   | -3.4951692361  | 5.2479863442   |
| C63 | 9.1595116647#  | 0.1191580140#  | 11.4478229114# |
| H64 | 9.8026124633   | -0.1466766910  | 10.6022242316  |
| H65 | 9.7536088501   | -0.0099344485  | 12.3631089826  |
| C66 | 7.9361419552   | -0.7902268824  | 11.5059081757  |
| H67 | 7.2408145006   | -0.4380677246  | 12.2740165364  |
| H68 | 8.2322483881   | -1.8055588114  | 11.8013975170  |
| C69 | 7.1462007194   | -0.9032951521  | 10.2010015113  |
| O70 | 7.6161331041   | -0.3084275603  | 9.1794792600   |
| O71 | 6.1061422638   | -1.6235692512  | 10.2342645471  |
| C72 | 8.7726327504   | 1.5964893709   | 11.3611386921  |
| O73 | 7.6648516953   | 2.0127558309   | 11.7121674557  |
| N74 | 9.7709827556   | 2.4266311349   | 10.9566649375  |

|      |                |                 |                |
|------|----------------|-----------------|----------------|
| H75  | 10.5857734738  | 2.0185288314    | 10.5177547123  |
| C76  | 9.5677774590#  | 3.8588146781#   | 10.7651886794# |
| H77  | 10.4927928610  | 4.3882830957    | 11.0027184585  |
| H78  | 8.7778238756   | 4.1713444580    | 11.4508871160  |
| C79  | 9.2163689807   | 4.1639433269    | 9.2917089992   |
| O80  | 10.0971406463  | 4.4355959102    | 8.4798569451   |
| N81  | 7.8930545303   | 4.0775513909    | 8.9875090020   |
| H82  | 7.2361112341   | 3.7007769986    | 9.6653082608   |
| C83  | 7.4099175024   | 4.1351976490    | 7.6197835478   |
| H84  | 6.7312425634   | 4.9816301438    | 7.4759782718   |
| H85  | 8.2849292801   | 4.2665406626    | 6.9754090778   |
| C86  | 6.6521679462   | 2.8580878845    | 7.2237262501   |
| O87  | 5.5344030079   | 2.9431355256    | 6.6971055341   |
| O88  | 7.2954268183   | 1.7645102978    | 7.4982185664   |
| C89  | 11.5816617008# | -0.6170834067#  | 3.4808991646#  |
| H90  | 12.4441752181# | -1.2180927211#  | 3.7284029168#  |
| H91  | 11.8304270752# | 0.3821370063#   | 3.1552080772#  |
| H92  | 11.1184455804  | -1.0965979069   | 2.6073281384   |
| C93  | 10.5335787863  | -0.4730115378   | 4.5928538615   |
| H94  | 9.9288728427   | 0.4169096325    | 4.3798024084   |
| H95  | 10.9978157404  | -0.2856716755   | 5.5674155745   |
| C96  | 9.5901921727   | -1.6757155334   | 4.6643780227   |
| H97  | 10.0904176497  | -2.5222986772   | 5.1562205201   |
| H98  | 9.3336788775   | -2.0232039658   | 3.6592755086   |
| C99  | 8.2750227454   | -1.3720990049   | 5.3706896159   |
| O100 | 7.2375142948   | -1.8376021909   | 4.8193075477   |
| O101 | 8.3151475701   | -0.6869300592   | 6.4472416668   |
| C102 | 10.8187241880# | 4.2285681597#   | -0.8150213996# |
| H103 | 11.5403644085# | 3.4839224127#   | -0.5131309584# |
| H104 | 11.2010929081# | 5.2306259413#   | -0.6882232618# |
| H105 | 10.6794883404  | 4.1029232326    | -1.8964690970  |
| C106 | 9.4748431992   | 3.9860154202    | -0.1030764430  |
| H107 | 9.0102078136   | 3.0970625807    | -0.5546713985  |
| H108 | 8.7878299426   | 4.8195324159    | -0.3032468728  |
| C109 | 9.6048283044   | 3.7815306405    | 1.4141806375   |
| H110 | 10.0680909689  | 4.6705859320    | 1.8618619113   |
| H111 | 10.2809129878  | 2.9406931983    | 1.6200960854   |
| C112 | 8.2793753147   | 3.5430787654    | 2.1528161472   |
| H113 | 7.5936934393   | 4.3830317526    | 1.9597175788   |
| H114 | 8.4692048055   | 3.5135362759    | 3.2306239434   |
| N115 | 7.6516767723   | 2.2705409404    | 1.7883447067   |
| H116 | 7.6978044475   | 1.9766474118    | 0.8221823638   |
| C117 | 6.7610095967   | 1.6019733691    | 2.5647943893   |
| N118 | 6.3515961036   | 2.1364965300    | 3.7214295809   |
| H119 | 5.8994447810   | 1.5452647308    | 4.4237860845   |
| H120 | 6.3105351741   | 3.1328734969    | 3.8726584687   |
| N121 | 6.3033678808   | 0.4122392872    | 2.1848202743   |
| H122 | 6.8696564189   | -0.3018572279   | 1.7041240949   |
| H123 | 5.5861792490   | -0.0423698429   | 2.7752535591   |
| C124 | 11.8423975860# | -5.3930894542#  | 7.2492548814#  |
| H125 | 11.2522023258# | -5.9724612836#  | 6.5547079597#  |
| H126 | 12.7964628978# | -5.8524491634#  | 7.4617421048#  |
| H127 | 12.0246566922  | -4.3993950193   | 6.8273387487   |
| C128 | 11.1438578467  | -5.3139775152   | 8.6217008818   |
| H129 | 11.8237547229  | -4.8340543654   | 9.3404548593   |
| H130 | 10.9863045883  | -6.3353124563   | 8.9951192076   |
| C131 | 9.8380033179   | -4.5854361423   | 8.6490095951   |
| N132 | 8.9729821909   | -4.6645927269   | 9.7370293987   |
| C133 | 9.2400692874   | -3.7105531166   | 7.7853790691   |
| H134 | 9.5628850514   | -3.3537878411   | 6.8250233242   |
| C135 | 7.9076928943   | -3.8723339899   | 9.5341952371   |
| H136 | 7.0811411303   | -3.7041298843   | 10.2078831030  |
| N137 | 8.0593398420   | -3.2829146534   | 8.3552755597   |
| H138 | 7.3347749054   | -2.6259455359   | 7.9262882343   |
| C139 | 6.0989355780#  | -4.2351880402#  | -1.2221969304# |
| H140 | 5.3833633678#  | -4.5684340417#  | -1.9592873380# |
| H141 | 7.1094170473#  | -4.1301812586#  | -1.5886719422# |
| H142 | 5.7985266320   | -3.2110508994   | -0.9653142348  |
| C143 | 5.9903577982   | -5.0711859826   | 0.0705112014   |
| H144 | 5.9462620587   | -6.1440210267   | -0.1444026265  |
| H145 | 6.8721946971   | -4.8803626181   | 0.6946043227   |
| C146 | 4.7531881911   | -4.6410118723   | 0.8815578960   |
| O147 | 4.7559852088   | -3.4474294085   | 1.3057764208   |
| O148 | 3.8107675120   | -5.4726701967   | 1.0641211602   |
| C149 | -1.8288750596# | -11.9867171664# | 4.2485687038#  |
| H150 | -2.3586934181# | -12.7180950354# | 3.6563001832#  |
| H151 | -2.3284065913# | -11.7832504187# | 5.1842337752#  |
| H152 | -0.8579059807  | -12.4265135155  | 4.5142707877   |
| C153 | -1.6173138759  | -10.6702565181  | 3.4601736551   |
| H154 | -2.4981033023  | -10.4810567963  | 2.8301370057   |
| H155 | -1.5634860202  | -9.8298078160   | 4.1632016367   |
| C156 | -0.3485894031  | -10.6773601005  | 2.5862128074   |
| H157 | 0.5326938119   | -10.57932923670 | 3.2364321065   |
| H158 | -0.2523847093  | -11.6603404901  | 2.1036666828   |
| C159 | -0.3092758739  | -9.6230341476   | 1.4631681446   |
| H160 | 0.6022657625   | -9.7603370126   | 0.8655708350   |
| H161 | -1.1487732178  | -9.8193005107   | 0.7814947005   |
| C162 | -0.4097225158  | -8.1414678574   | 1.8451044008   |
| H163 | -0.5821091204  | -7.5485900299   | 0.9427633808   |
| H164 | -1.2405697646  | -7.9488171196   | 2.5296941032   |
| N165 | 0.8186732597   | -7.5615986286   | 2.4746947382   |
| H166 | 0.8680647948   | -6.5240905546   | 2.2031981632   |
| H167 | 0.8222963424   | -7.6069990350   | 3.5112955709   |

|      |                |                |                |
|------|----------------|----------------|----------------|
| H168 | 1.7065327269   | -7.9571870613  | 2.0928406465   |
| C169 | -1.8652228158# | -2.8063899723# | 9.6692394734#  |
| H170 | -2.8449961107# | -3.2600297460# | 9.6435887468#  |
| H171 | -1.9204754843# | -1.8064531627# | 10.0735583360# |
| H172 | -1.2272832252  | -3.4201294979  | 10.3179557225  |
| C173 | -1.3545494620  | -2.7827197178  | 8.2146022174   |
| H174 | -0.2767700701  | -2.5824962571  | 8.2045323606   |
| C175 | -2.0494979987  | -1.6686781254  | 7.4172976151   |
| H176 | -1.8103824354  | -0.6794436217  | 7.8291550554   |
| H177 | -3.1418747721  | -1.7886819253  | 7.4435464932   |
| H178 | -1.7415300671  | -1.6759464430  | 6.3658304475   |
| C179 | -1.5832492497  | -4.1477905039  | 7.5539836997   |
| H180 | -1.0650808914  | -4.9509900940  | 8.0903518253   |
| H181 | -1.2187974558  | -4.1587914359  | 6.5236797146   |
| H182 | -2.6548350048  | -4.3930395004  | 7.5372216616   |
| C183 | 0.8676053674   | -6.9177848470  | 5.6013589132   |
| O184 | 1.1900705943   | -1.7433743965  | 4.6537927504   |
| H185 | 1.2098401191   | -2.5014506569  | 5.2971719993   |
| O186 | 4.7521626472   | -1.2025253998  | 3.7732603808   |
| O187 | 7.1882272525   | -2.1836957497  | 1.8249047979   |
| H188 | 7.1097341200   | -2.1953977675  | 2.7974005110   |
| H189 | 6.3342038341   | -2.5987703974  | 1.5367398443   |
| O190 | -0.9396618905  | 1.7663533986   | 5.2150551695   |
| H191 | -1.1128382745  | 1.0202730011   | 4.5813559200   |
| H192 | -1.6931415103  | 1.7433030661   | 5.8245497480   |
| O193 | 3.0816305694   | 3.2137591658   | 8.2600449344   |
| H194 | 3.9133342482   | 3.4247824111   | 8.7243932823   |
| H195 | 2.5748830825   | 2.7073464572   | 8.9251811526   |
| O196 | 5.3858246479   | 2.5637794949   | 10.0175515734  |
| H197 | 5.3362170210   | 1.7160337776   | 9.5228429855   |
| H198 | 5.9546297986   | 2.3668809195   | 10.7856169541  |
| O199 | 2.7053680549   | -1.8510279753  | 2.2445423991   |
| H200 | 3.4118157020   | -2.4979475412  | 1.9610368240   |
| H201 | 1.2178818395   | -4.6580573285  | 6.2550321788   |
| O202 | 1.0424771934   | -5.1789105994  | 1.3289002136   |
| H203 | 2.0180465497   | -5.0532009790  | 1.2628158157   |
| H204 | 0.6627396601   | -4.3301184330  | 1.6656275098   |
| O205 | 0.1049949365   | -2.6852891463  | 2.1624322141   |
| H206 | 0.9544922560   | -2.2625964326  | 1.8926836429   |
| H207 | 0.2435336447   | -2.6719611907  | 3.1315660330   |
| O208 | 3.3005003859   | -8.1191691566  | 1.22806866053  |
| H209 | 3.5620593267   | -7.1780983559  | 1.0298588378   |
| H210 | 4.0710922519   | -8.4988484861  | 1.6746325497   |
| O211 | 1.3316140561   | -3.7304952304  | 6.5543129392   |
| H212 | 2.2552289103   | -3.6370968111  | 6.8315368887   |
| H213 | 9.1115053298   | -5.2391183675  | 10.5581907693  |
| O214 | 1.2258053261   | 0.5372511828   | 6.3888202691   |
| H215 | 0.4584033902   | 1.0667233807   | 6.0560350702   |
| H216 | 1.1876925086   | -0.3024494682  | 5.8750343749   |
| O217 | -1.1321031816  | -0.5486857329  | 3.8544165946   |
| H218 | -1.1615245499  | -0.8864220715  | 2.9427156567   |
| H219 | -0.2953188007  | -0.9412624292  | 4.2013560727   |

### Structure used in Fig 3:

|     |                |                |                |
|-----|----------------|----------------|----------------|
| Mn1 | 3.0272218386   | -1.4836476192  | 3.6742911793   |
| Mn2 | 4.6006557222   | -1.4779100989  | 8.61925550942  |
| Mn3 | 5.3008039940   | -1.5296078587  | 5.2571033586   |
| Mn4 | 6.5938269270   | -0.0486226414  | 7.3002445347   |
| O5  | 3.6026720474   | -1.2561899256  | 5.5802417196   |
| O6  | 5.7876413736   | 0.1962520897   | 5.7392685599   |
| O7  | 5.0861991044   | 0.2788432663   | 8.2802933840   |
| O8  | 5.9464235148   | -1.8211502851  | 7.2802289928   |
| Ca9 | 3.3846612275   | 1.3304473921   | 6.8840764995   |
| C10 | 0.6675458165#  | 1.9515084173#  | 1.7063477084#  |
| H11 | 1.2251835742#  | 1.9058029389#  | 0.7825776968#  |
| H12 | -0.3243896358# | 2.3686418809#  | 1.6143240713#  |
| H13 | 0.4729291364   | 0.8917272920   | 1.9236168459   |
| C14 | 1.4952507817   | 2.4904089061   | 2.8854958620   |
| H15 | 0.8387109258   | 2.8533956270   | 3.6842185085   |
| H16 | 2.1188204126   | 3.3482256672   | 2.6035106111   |
| C17 | 2.4268785988   | 1.4840980625   | 3.6041238205   |
| O18 | 3.0406290349   | 1.8814239941   | 4.6160595476   |
| O19 | 2.4989278476   | 0.3047200369   | 3.1028536200   |
| C20 | 1.0582598970#  | 1.1829962110#  | 13.4563132843# |
| H21 | 0.3702238907#  | 0.3601390909#  | 13.5824629993# |
| H22 | 0.7336467761#  | 2.1291270612#  | 13.8635786785# |
| H23 | 1.9508247029   | 0.9064820739   | 14.0376706895  |
| C24 | 1.4465897117   | 1.2921957941   | 11.9860341927  |
| H25 | 2.2488725126   | 2.0281235502   | 11.8545339857  |
| H26 | 0.6025788550   | 1.6378235849   | 11.3770629440  |
| C27 | 1.9193045892   | -0.0744007283  | 11.5032458343  |
| H28 | 1.0746621505   | -0.7772933128  | 11.4437237679  |
| H29 | 2.6194589135   | -0.5163305877  | 12.2225626827  |
| C30 | 2.6067904552   | -0.0622698005  | 10.1583837559  |
| O31 | 2.4726071395   | 0.8818550023   | 9.3690658421   |
| O32 | 3.3153024580   | -1.1334873798  | 9.9547866972   |
| C33 | 2.7844501128#  | -7.8608079441# | 8.6257439128#  |
| H34 | 2.4765599527   | -8.8267443210  | 9.0453674137   |
| H35 | 1.9469460097   | -7.4708220283  | 8.0414063580   |
| C36 | 4.0067095334   | -8.0832115829  | 7.7352286779   |

|      |                |                |                |
|------|----------------|----------------|----------------|
| O37  | 5.1363386837   | -8.2763265637  | 8.2337620347   |
| C38  | 3.1254320407   | -6.9128911438  | 9.8107562297   |
| H39  | 3.8513560335   | -7.4195828728  | 10.4580275456  |
| H40  | 2.2225505803   | -6.7397908643  | 10.4035895369  |
| C41  | 3.6843470324   | -5.5932567488  | 9.3624185052   |
| N42  | 4.7839216249   | -5.5774663613  | 8.5212275678   |
| H43  | 5.2925263540   | -6.4254186791  | 8.2632429384   |
| C44  | 3.3235413645   | -4.2724540783  | 9.4910732992   |
| H45  | 2.5247283705   | -3.8258594272  | 10.0613864554  |
| C46  | 5.0146556578   | -4.3223168689  | 8.1246168440   |
| H47  | 5.7258438167   | -4.0401600198  | 7.3714580355   |
| N48  | 4.1658974487   | -3.4905853313  | 8.7148736897   |
| N49  | 3.8114778243   | -7.9240466791  | 6.4173398563   |
| H50  | 2.8597683184   | -7.7071475681  | 6.0895404711   |
| C51  | 4.9172533283#  | -7.8463448436# | 5.4688658747#  |
| H52  | 4.6285743646   | -8.4013837173  | 4.5668743456   |
| H53  | 5.7731942401   | -8.3534406017  | 5.9181626592   |
| C54  | 5.2952861876   | -6.3950660345  | 5.0884104844   |
| H55  | 6.1590158571   | -6.4308166640  | 4.4114190076   |
| H56  | 5.6397867874   | -5.8774305270  | 5.9866275290   |
| C57  | 4.1483215660   | -5.6061108355  | 4.4365730030   |
| H58  | 3.1860149936   | -5.8706850139  | 4.8927769095   |
| H59  | 4.0380815221   | -5.8506860556  | 3.3721898347   |
| C60  | 4.2273802902   | -4.0889567227  | 4.5076576509   |
| O61  | 3.2268065657   | -3.4721192042  | 4.0197495560   |
| O62  | 5.2083283245   | -3.5240540098  | 5.0781788450   |
| C63  | 9.1595116866#  | 0.1191580117#  | 11.4478229222# |
| H64  | 9.8172505654   | -0.1350967252  | 10.6094885811  |
| H65  | 9.7389396804   | -0.0259366426  | 12.3704000261  |
| C66  | 7.9396602497   | -0.7942075585  | 11.4731842869  |
| H67  | 7.2227741365   | -0.4409586402  | 12.2211733583  |
| H68  | 8.2321682470   | -1.8057358626  | 11.7839070651  |
| C69  | 7.1801847967   | -0.9273594076  | 10.1529591104  |
| O70  | 7.6301723836   | -0.3291596979  | 9.1301317684   |
| O71  | 6.1587422171   | -1.6749477279  | 10.1844356322  |
| C72  | 8.7835221863   | 1.5976205621   | 11.3851516354  |
| O73  | 7.6903428141   | 2.0165702725   | 11.7781169287  |
| N74  | 9.7698642622   | 2.4259096616   | 10.9534140228  |
| H75  | 10.5706589118  | 2.0140881199   | 10.4928239407  |
| C76  | 9.5677774979#  | 3.8588146911#  | 10.7651887005# |
| H77  | 10.4973795473  | 4.3871435541   | 10.9854261256  |
| H78  | 8.7889357950   | 4.1723078129   | 11.4636640733  |
| C79  | 9.1921065551   | 4.1684496360   | 9.2972750497   |
| O80  | 10.0540406358  | 4.5140772942   | 8.4929388905   |
| N81  | 7.8795859408   | 3.9962907388   | 8.9873634909   |
| H82  | 7.2352837583   | 3.5920490342   | 9.6621914291   |
| C83  | 7.3836796048   | 4.0880060940   | 7.6257722681   |
| H84  | 6.6876021786   | 4.9258671688   | 7.5152482707   |
| H85  | 8.2518765904   | 4.2593939905   | 6.9810238726   |
| C86  | 6.6463880469   | 2.8119634079   | 7.1849111107   |
| O87  | 5.5325831476   | 2.8966443276   | 6.6535992941   |
| O88  | 7.3014884884   | 1.7172150335   | 7.4220540565   |
| C89  | 11.5816617284# | -0.6170834036# | 3.4808991683#  |
| H90  | 12.4441752209# | -1.2180927203# | 3.7284029092#  |
| H91  | 11.8304270711# | 0.3821370059#  | 3.1552080731#  |
| H92  | 11.1245070809  | -1.0953132814  | 2.6030622561   |
| C93  | 10.5280394795  | -0.4808774609  | 4.5826181383   |
| H94  | 9.8939325473   | 0.3818175197   | 4.3440621226   |
| H95  | 10.9788539492  | -0.2557384378  | 5.5553481656   |
| C96  | 9.6315174942   | -1.7170850500  | 4.6746521782   |
| H97  | 10.1559505771  | -2.5232771177  | 5.2057200355   |
| H98  | 9.4071478987   | -2.1044983307  | 3.6767620392   |
| C99  | 8.2987303167   | -1.4246180177  | 5.3448263466   |
| O100 | 7.2766862780   | -1.8820266457  | 4.7634429044   |
| O101 | 8.3047015554   | -0.7464496721  | 6.4233856566   |
| C102 | 10.8187241892# | 4.2285681673#  | -0.8150213986# |
| H103 | 11.5403644067# | 3.4839224114#  | -0.5131309573# |
| H104 | 11.2010929108# | 5.2306259410#  | -0.6882232677# |
| H105 | 10.6705784665  | 4.0999726464   | -1.8948289515  |
| C106 | 9.4844799145   | 4.0001064630   | -0.0856248927  |
| H107 | 9.0295608829   | 3.0873792972   | -0.4979145011  |
| H108 | 8.7854219071   | 4.8161794877   | -0.3140172222  |
| C109 | 9.6350354830   | 3.8629370957   | 1.4375919937   |
| H110 | 10.0723377318  | 4.7837484696   | 1.8449488242   |
| H111 | 10.3386170716  | 3.0519696408   | 1.6690404510   |
| C112 | 8.3222159068   | 3.6055119813   | 2.1910926790   |
| H113 | 7.6196613744   | 4.4329323567   | 2.0051501420   |
| H114 | 8.5230147044   | 3.5763778403   | 3.2674857784   |
| N115 | 7.7237850193   | 2.3252018957   | 1.8152152813   |
| H116 | 7.7937941901   | 2.0422710657   | 0.8476177196   |
| C117 | 6.8113735851   | 1.6386978045   | 2.5482133342   |
| N118 | 6.3381930860   | 2.1415890376   | 3.6925662647   |
| H119 | 5.9106696059   | 1.5216591434   | 4.3886159211   |
| H120 | 6.4007402326   | 3.1197301895   | 3.9270671759   |
| N121 | 6.3774881923   | 0.4586176927   | 2.1116024290   |
| H122 | 6.9702527433   | -0.2306524479  | 1.6318758472   |
| H123 | 5.6532673064   | -0.0343895843  | 2.6615160308   |
| C124 | 11.8423976049# | -5.3930894674# | 7.2492548871#  |
| H125 | 11.2522023171# | -5.9724612784# | 6.5547079627#  |
| H126 | 12.7964629013# | -5.8524491602# | 7.4617420964#  |
| H127 | 12.0251146396  | -4.4003852903  | 6.8247856490   |
| C128 | 11.1339896786  | -5.3090028910  | 8.6173627424   |
| H129 | 11.7996541683  | -4.8067248535  | 9.3340035721   |

|      |                |                 |                |
|------|----------------|-----------------|----------------|
| H130 | 10.9931871906  | -6.3284623002   | 9.0021959947   |
| C131 | 9.8123048223   | -4.6064820535   | 8.6273222021   |
| N132 | 8.9287633122   | -4.7099637919   | 9.6990839788   |
| C133 | 9.2121879005   | -3.7361045514   | 7.7608105351   |
| H134 | 9.5460563532   | -3.3640446727   | 6.8106337758   |
| C135 | 7.8510448995   | -3.9378038868   | 9.4852768621   |
| H136 | 7.0157175753   | -3.7821164277   | 10.1506855422  |
| N137 | 8.0119279450   | -3.3382369874   | 8.3118996852   |
| H138 | 7.2953943347   | -2.6838905990   | 7.8808085706   |
| C139 | 6.0989355787#  | -4.2351880641#  | -1.2221969393# |
| H140 | 5.3833633621#  | -4.5684340300#  | -1.9592873376# |
| H141 | 7.1094170487#  | -4.1301812536#  | -1.5886719370# |
| H142 | 5.7921648842   | -3.2306445723   | -0.9108025151  |
| C143 | 6.0548632935   | -5.1593704873   | 0.0132706193   |
| H144 | 6.0031878642   | -6.2141474712   | -0.2760801671  |
| H145 | 6.9649742807   | -5.0068913200   | 0.6066558344   |
| C146 | 4.8652503075   | -4.7766973431   | 0.8960879862   |
| O147 | 4.9028537824   | -3.6025254552   | 1.3658397547   |
| O148 | 3.9234322172   | -5.6040455289   | 1.0888595523   |
| C149 | -1.8288749940# | -11.9867172644# | 4.2485686955#  |
| H150 | -2.3586934525# | -12.7180950344# | 3.6563002127#  |
| H151 | -2.3284066229# | -11.7832503685# | 5.1842337475#  |
| H152 | -0.8543224556  | -12.4214644667  | 4.5095185485   |
| C153 | -1.6310500286  | -10.6619619589  | 3.4723513567   |
| H154 | -2.5422416493  | -10.4423240182  | 2.8972460929   |
| H155 | -1.5173408149  | -9.8379536830   | 4.1876748629   |
| C156 | -0.4134486296  | -10.6759720776  | 2.5300032506   |
| H157 | 0.5040911177   | -10.5925888015  | 3.1307656932   |
| H158 | -0.3551394507  | -11.6550690486  | 2.0323623207   |
| C159 | -0.4246861716  | -9.6099814472   | 1.4163530419   |
| H160 | 0.4474201182   | -9.7572796767   | 0.7646588175   |
| H161 | -1.3065073745  | -9.7860422754   | 0.7835550661   |
| C162 | -0.4761816961  | -8.1289787112   | 1.8139056184   |
| H163 | -0.6712588076  | -7.5275694247   | 0.9210418910   |
| H164 | -1.2765132010  | -7.9248278326   | 2.5308747564   |
| N165 | 0.7881777194   | -7.5854058466   | 2.4033904786   |
| H166 | 0.8795854319   | -6.5487975044   | 2.1259919271   |
| H167 | 0.8134278865   | -7.6267470534   | 3.4424590084   |
| H168 | 1.6528811973   | -8.0190543552   | 2.0098901189   |
| C169 | -1.8652229577# | -2.8063899293#  | 9.6692394302#  |
| H170 | -2.8449969096# | -3.2600297918#  | 9.6435887901#  |
| H171 | -1.9204754493# | -1.8064531710#  | 10.0735583614# |
| H172 | -1.2361064219  | -3.4225041078   | 10.3236940872  |
| C173 | -1.3272230883  | -2.7726106774   | 8.2252238454   |
| H174 | -0.2335173390  | -2.6527171766   | 8.2608313649   |
| C175 | -1.9228030336  | -1.5876247087   | 7.4504097132   |
| H176 | -1.7432566630  | -0.6372515295   | 7.9703621019   |
| H177 | -3.0103241884  | -1.7023216093   | 7.3454902590   |
| H178 | -1.4916202103  | -1.4954028898   | 6.4482682913   |
| C179 | -1.6120639295  | -4.0974066449   | 7.5067187376   |
| H180 | -1.1386199075  | -4.9457070460   | 8.0148714154   |
| H181 | -1.2419024870  | -4.0762596973   | 6.4786883757   |
| H182 | -2.6933557326  | -4.2891649046   | 7.4726799570   |
| C183 | 0.8190664933   | -7.0614303663   | 5.5658865683   |
| O184 | 1.2056254718   | -1.6910017694   | 4.1616081735   |
| H185 | 1.0813360457   | -2.4156267690   | 4.8111413699   |
| O186 | 4.8932736989   | -1.2816824051   | 3.5604669488   |
| O187 | 7.2931027136   | -2.1674594192   | 1.7686555394   |
| H188 | 7.2043449318   | -2.1607469539   | 2.7399134726   |
| H189 | 6.4592696725   | -2.6282509413   | 1.4983433932   |
| O190 | 0.9630378325   | 1.8661328919    | 7.0150614669   |
| H191 | 0.4788978513   | 1.4180498229    | 6.2726152922   |
| H192 | 0.7168302838   | 1.3614070660    | 7.8064929287   |
| O193 | 3.3074587182   | 3.3135168727    | 8.4912702023   |
| H194 | 4.1089384460   | 3.3038395731    | 9.0540147060   |
| H195 | 2.6283372527   | 2.9447239529    | 9.0820554129   |
| O196 | 5.4808953657   | 2.4372684481    | 10.0645551880  |
| H197 | 5.4316579772   | 1.6036472329    | 9.5436699474   |
| H198 | 6.0459445023   | 2.2354549537    | 10.8351808133  |
| O199 | 2.8929908035   | -1.9142594143   | 1.9513947582   |
| H200 | 3.5908292048   | -2.6052777709   | 1.7606263209   |
| H201 | 0.9042699908   | -4.7295061523   | 6.0275645660   |
| O202 | 1.1491993096   | -5.2058651013   | 1.3120442076   |
| H203 | 2.1272978042   | -5.1064417355   | 1.2762209298   |
| H204 | 0.7685514330   | -4.3147255089   | 1.5433074341   |
| O205 | 0.2540452721   | -2.6586477890   | 1.7249093191   |
| H206 | 1.1112513606   | -2.3007680619   | 1.4072261688   |
| H207 | 0.3499671595   | -2.4089517410   | 2.6716608130   |
| O208 | 3.3136769786   | -8.2265983409   | 1.2633930361   |
| H209 | 3.6033726609   | -7.2991079724   | 1.0528110090   |
| H210 | 3.9997437732   | -8.5607362259   | 1.8602770615   |
| O211 | 1.3076401575   | -3.8382116433   | 6.1056226126   |
| H212 | 2.0532887337   | -3.8858105188   | 5.4828965769   |
| H213 | 9.0636942681   | -5.2906027108   | 10.5165935382  |
| O214 | 1.9682672978   | -0.9167043000   | 7.3873493196   |
| H215 | 1.1958282398   | -1.3707015539   | 7.7554419797   |
| H216 | 2.2801963090   | -1.4598882347   | 6.6322117609   |
| O217 | -0.1375794644  | 0.4444354704    | 5.0026804743   |
| H218 | -0.8802783738  | 0.5685366403    | 4.3871607186   |
| H219 | 0.3750103492   | -0.3515542836   | 4.6741799011   |

## Structure used in Fig 4:

|     |                |                |                |
|-----|----------------|----------------|----------------|
| Mn1 | 2.9719376998   | -1.4355953386  | 3.7671020812   |
| Mn2 | 4.5203306698   | -1.5627566785  | 8.7122932306   |
| Mn3 | 5.2452537718   | -1.4878341245  | 5.3593070262   |
| Mn4 | 6.5512690570   | -0.0722443438  | 7.4076689377   |
| O5  | 3.5338751108   | -1.0611249694  | 5.6572289140   |
| O6  | 5.7817002436   | 0.2158398333   | 5.8126939212   |
| O7  | 5.0166801004   | 0.2308416602   | 8.3343860768   |
| O8  | 5.8924067737   | -1.8355394023  | 7.3452801823   |
| Ca9 | 3.6215080174   | 1.3712716745   | 6.6410715767   |
| C10 | 0.6675457617#  | 1.9515086227#  | 1.7063475732#  |
| H11 | 1.2251835950#  | 1.9058028567#  | 0.7825777133#  |
| H12 | -0.3243896670# | 2.3686418077#  | 1.6143240750#  |
| H13 | 0.4737573006   | 0.8995201806   | 1.9483565768   |
| C14 | 1.4805180479   | 2.5231155451   | 2.8725520436   |
| H15 | 0.8056987986   | 2.8081002258   | 3.6898169228   |
| H16 | 2.0352956296   | 3.4311880053   | 2.6081105104   |
| C17 | 2.4835453918   | 1.5689541915   | 3.5495459746   |
| O18 | 3.2570717247   | 2.0453901088   | 4.4098842130   |
| O19 | 2.4199301634   | 0.3333464319   | 3.1996274384   |
| C20 | 1.0582598554#  | 1.1829962476#  | 13.4563133666# |
| H21 | 0.3702239074#  | 0.3601390786#  | 13.5824630085# |
| H22 | 0.7336467811#  | 2.1291270665#  | 13.8635786702# |
| H23 | 1.9541186915   | 0.9013363490   | 14.0286475595  |
| C24 | 1.4331549623   | 1.2636692165   | 11.9703959743  |
| H25 | 2.3291475907   | 1.8826878172   | 11.8352356947  |
| H26 | 0.6353448510   | 1.7337920563   | 11.3837601199  |
| C27 | 1.6924166573   | -0.1602751745  | 11.4542323256  |
| H28 | 0.7342492303   | -0.6746630023  | 11.2908784579  |
| H29 | 2.2356773175   | -0.7413812918  | 12.2062626875  |
| C30 | 2.4781987526   | -0.2398598117  | 10.1610795188  |
| O31 | 2.2609675296   | 0.5285216184   | 9.2079013675   |
| O32 | 3.3792844858   | -1.1734876191  | 10.1758521697  |
| C33 | 2.7844500817#  | -7.8608080040# | 8.6257439553#  |
| H34 | 2.3663153730   | -8.8231035211  | 8.9487179254   |
| H35 | 2.0050243704   | -7.3492154728  | 8.0570246178   |
| C36 | 4.0075059789   | -8.1303812672  | 7.7360641249   |
| O37 | 5.1295800316   | -8.3656473266  | 8.2377738615   |
| C38 | 3.1813311927   | -7.0569265302  | 9.8951601375   |
| H39 | 3.8731355609   | -7.6654256208  | 10.4894701008  |
| H40 | 2.2901800946   | -6.8829827238  | 10.5057441327  |
| C41 | 3.8143295165   | -5.7377447003  | 9.5552248940   |
| N42 | 4.9069262123   | -5.7172307278  | 8.7047285167   |
| H43 | 5.3754777956   | -6.5723572574  | 8.3947676511   |
| C44 | 3.5016455845   | -4.4126819000  | 9.7569254506   |
| H45 | 2.7200915483   | -3.9661806312  | 10.3517589689  |
| C46 | 5.1699660648   | -4.4490230757  | 8.3635293324   |
| H47 | 5.8590067890   | -4.1594420866  | 7.5928579470   |
| N48 | 4.3615331529   | -3.6241206387  | 9.0095993161   |
| N49 | 3.8166247342   | -7.9675145970  | 6.4182317318   |
| H50 | 2.8584386987   | -7.7979178212  | 6.0842370644   |
| C51 | 4.9172533511#  | -7.8463448581# | 5.4688658318#  |
| H52 | 4.6347716371   | -8.3724400833  | 4.5486787895   |
| H53 | 5.7867066667   | -8.3511815506  | 5.8948601839   |
| C54 | 5.2645987396   | -6.3668067102  | 5.1479603308   |
| H55 | 6.1345712730   | -6.3543789226  | 4.4780294818   |
| H56 | 5.5861192712   | -5.8814976126  | 6.0728234969   |
| C57 | 4.1062104282   | -5.5691360724  | 4.5213089561   |
| H58 | 3.1536284803   | -5.8623789704  | 4.9752765569   |
| H59 | 3.9974458044   | -5.7873546078  | 3.4520078672   |
| C60 | 4.1592834414   | -4.0485138785  | 4.6358286718   |
| O61 | 3.1758282731   | -3.4223539990  | 4.1231713473   |
| O62 | 5.1151337054   | -3.4822893110  | 5.2479101006   |
| C63 | 9.1595117756#  | 0.1191580412#  | 11.4478229474# |
| H64 | 9.7946612802   | -0.1430018458  | 10.5947503029  |
| H65 | 9.7648363142   | -0.0136219359  | 12.3554567781  |
| C66 | 7.9413464117   | -0.7879372173  | 11.5156143199  |
| H67 | 7.2389911989   | -0.4184296245  | 12.2694913631  |
| H68 | 8.2339373865   | -1.7955892172  | 11.8380506831  |
| C69 | 7.1571279453   | -0.9380132850  | 10.2141053114  |
| O70 | 7.5900279378   | -0.3356211342  | 9.1767544451   |
| O71 | 6.1517058149   | -1.6932578585  | 10.2629649846  |
| C72 | 8.7804636823   | 1.5985210524   | 11.3750654580  |
| O73 | 7.6837159230   | 2.0224326644   | 11.7528067697  |
| N74 | 9.7720811165   | 2.4257443880   | 10.9507918896  |
| H75 | 10.5795570201  | 2.0158783340   | 10.5001122724  |
| C76 | 9.567775311#   | 3.8588146980#  | 10.7651887465# |
| H77 | 10.4931641081  | 4.3886282926   | 11.0002538707  |
| H78 | 8.7806087333   | 4.1672532558   | 11.4559602061  |
| C79 | 9.2077706442   | 4.1715383585   | 9.2973768278   |
| O80 | 10.0743082007  | 4.5033902477   | 8.4921400575   |
| N81 | 7.8925987789   | 4.0193368177   | 8.9870737758   |
| H82 | 7.2503757176   | 3.6131017563   | 9.6618406917   |
| C83 | 7.4133911388   | 4.0921549412   | 7.6203459000   |
| H84 | 6.7304813510   | 4.9364120205   | 7.4831401497   |
| H85 | 8.2893719147   | 4.2412203880   | 6.9803981670   |
| C86 | 6.6641009030   | 2.8210222194   | 7.1965858239   |
| O87 | 5.5875275702   | 2.9336496563   | 6.5883421744   |
| O88 | 7.2520780166   | 1.7169894689   | 7.5262843771   |
| C89 | 11.5816617646# | -0.6170833923# | 3.4808991662#  |

|      |                |                 |                |
|------|----------------|-----------------|----------------|
| H90  | 12.4441752188# | -1.2180927251#  | 3.7284029050#  |
| H91  | 11.8304270648# | 0.3821370057#   | 3.1552080677#  |
| H92  | 11.1238578357  | -1.0960601822   | 2.6039594879   |
| C93  | 10.5214223304  | -0.4862440070   | 4.5912181129   |
| H94  | 9.9295117076   | 0.4159328726    | 4.3938167230   |
| H95  | 10.9814835472  | -0.3263391553   | 5.5727537995   |
| C96  | 9.5576505917   | -1.6783344701   | 4.6329243590   |
| H97  | 10.0514855025  | -2.5517161555   | 5.0840128002   |
| H98  | 9.2855517426   | -1.9849766016   | 3.6186078978   |
| C99  | 8.2481381746   | -1.4030614339   | 5.3703688202   |
| O100 | 7.2075836789   | -1.8693949329   | 4.8177883432   |
| O101 | 8.2836353057   | -0.7555751578   | 6.4667302234   |
| C102 | 10.8187242272# | 4.2285682079#   | -0.8150214087# |
| H103 | 11.5403643946# | 3.4839224013#   | -0.5131309534# |
| H104 | 11.2010929240# | 5.2306259395#   | -0.6882232947# |
| H105 | 10.6741116539  | 4.1022838973    | -1.8955266304  |
| C106 | 9.4833029519   | 3.9917370508    | -0.0906944692  |
| H107 | 9.0141180849   | 3.1002746941    | -0.5323265024  |
| H108 | 8.7933012746   | 4.8238785138    | -0.2858886319  |
| C109 | 9.6391254591   | 3.7956951433    | 1.4243295295   |
| H110 | 10.0940103378  | 4.6931656962    | 1.8633998855   |
| H111 | 10.3315688232  | 2.9661105617    | 1.6212038974   |
| C112 | 8.3284640872   | 3.5326485363    | 2.1766337453   |
| H113 | 7.6312815959   | 4.3691991012    | 2.0117966746   |
| H114 | 8.5330489664   | 3.4795198911    | 3.2508690784   |
| N115 | 7.7133360772   | 2.2629160809    | 1.7856926515   |
| H116 | 7.7525834759   | 1.9972669944    | 0.8111994692   |
| C117 | 6.8223230231   | 1.5767890715    | 2.5438909559   |
| N118 | 6.4150522164   | 2.0822902922    | 3.7133699865   |
| H119 | 5.9757823217   | 1.4780277988    | 4.4130218607   |
| H120 | 6.4000481735   | 3.0729954536    | 3.9019375570   |
| N121 | 6.3631556171   | 0.3987509598    | 2.1296557854   |
| H122 | 6.9363755121   | -0.3091995932   | 1.6494534887   |
| H123 | 5.6432827964   | -0.0672883653   | 2.7068415095   |
| C124 | 11.8423976533# | -5.3930895048#  | 7.2492548963#  |
| H125 | 11.2522022958# | -5.9724612654#  | 6.5547079700#  |
| H126 | 12.7964629093# | -5.8524491526#  | 7.4617420769#  |
| H127 | 12.0243550958  | -4.3992262568   | 6.8276528987   |
| C128 | 11.1473997624  | -5.3148350799   | 8.6219584950   |
| H129 | 11.8278367795  | -4.8339733361   | 9.3396380055   |
| H130 | 10.9908739723  | -6.3361580706   | 8.9959649934   |
| C131 | 9.8423660477   | -4.5874919362   | 8.6487936597   |
| N132 | 8.9894759557   | -4.6498601366   | 9.7474570527   |
| C133 | 9.2355116582   | -3.7279397876   | 7.7769059625   |
| H134 | 9.5511642965   | -3.3810670978   | 6.8104995936   |
| C135 | 7.9204428859   | -3.8652457429   | 9.5446217594   |
| H136 | 7.0987695830   | -3.6871074170   | 10.2218109527  |
| N137 | 8.0604581337   | -3.2934413509   | 8.3546934686   |
| H138 | 7.3337275147   | -2.6603875455   | 7.9252007430   |
| C139 | 6.0989356442#  | -4.2351880738#  | -1.2221969734# |
| H140 | 5.3833633461#  | -4.5684340249#  | -1.9592873244# |
| H141 | 7.1094170446#  | -4.1301812371#  | -1.5886719436# |
| H142 | 5.7934826770   | -3.2254362510   | -0.9246364498  |
| C143 | 6.0339198523   | -5.1370065587   | 0.0294405594   |
| H144 | 5.9777434088   | -6.1963256803   | -0.2417360351  |
| H145 | 6.9393010046   | -4.9840067019   | 0.6300274478   |
| C146 | 4.8382432131   | -4.7421578646   | 0.9052811651   |
| O147 | 4.8684893545   | -3.5640677628   | 1.3699105083   |
| O148 | 3.9017743975   | -5.5751859849   | 1.1039179631   |
| C149 | -1.8288751269# | -11.9867172682# | 4.2485686461#  |
| H150 | -2.3586934077# | -12.7180950951# | 3.6563002476#  |
| H151 | -2.3284065653# | -11.7832503397# | 5.1842337719#  |
| H152 | -0.8577218159  | -12.4270703248  | 4.5131750915   |
| C153 | -1.6138315369  | -10.6716931730  | 3.4659738285   |
| H154 | -2.5435057309  | -10.4085853461  | 2.9403500694   |
| H155 | -1.4199640337  | -9.8564275202   | 4.1742057035   |
| C156 | -0.4515332537  | -10.7492529253  | 2.4587136119   |
| H157 | 0.4995146387   | -10.7216641600  | 3.0093390714   |
| H158 | -0.4749130768  | -11.7267478746  | 1.9559470500   |
| C159 | -0.4599778207  | -9.6775778168   | 1.3516624368   |
| H160 | 0.3744872763   | -9.8610108675   | 0.6605994504   |
| H161 | -1.3765393321  | -9.8017466160   | 0.7579900462   |
| C162 | -0.4183848153  | -8.2048689804   | 1.7741841533   |
| H163 | -0.5932438259  | -7.5722762385   | 0.8987603833   |
| H164 | -1.1917506639  | -7.9689395897   | 2.5105408410   |
| N165 | 0.8805944472   | -7.7577795095   | 2.3580689936   |
| H166 | 0.9637447307   | -6.6881534613   | 2.2866613859   |
| H167 | 0.9518340585   | -7.9585965702   | 3.3731765284   |
| H168 | 1.7181746522   | -8.1179453131   | 1.8474487943   |
| C169 | -1.8652232051# | -2.8063899173#  | 9.6692393484#  |
| H170 | -2.8449960720# | -3.2600298368#  | 9.6435888750#  |
| H171 | -1.9204753647# | -1.8064531757#  | 10.0735583848# |
| H172 | -1.2480835132  | -3.4134999847   | 10.3444394391  |
| C173 | -1.2882311515  | -2.8118474364   | 8.2426380562   |
| H174 | -0.2122361859  | -2.5975253455   | 8.2886923416   |
| C175 | -1.9375099568  | -1.7182380893   | 7.3832913572   |
| H176 | -1.7780373532  | -0.7219545171   | 7.8152822959   |
| H177 | -3.0209077303  | -1.8747107757   | 7.2934430658   |
| H178 | -1.5121102421  | -1.7217458375   | 6.3719522197   |
| C179 | -1.4809209151  | -4.1911574005   | 7.6003073753   |
| H180 | -0.9978726474  | -4.9803173047   | 8.1896636022   |
| H181 | -1.0563645835  | -4.2242643022   | 6.5944964140   |
| H182 | -2.5492107450  | -4.4380823079   | 7.5314871070   |

|       |               |               |               |
|-------|---------------|---------------|---------------|
| Cl183 | 0.8199073959  | -7.4450790818 | 5.4993788068  |
| O184  | 1.1496633206  | -1.6883792955 | 4.2562285464  |
| H185  | 1.0921370926  | -2.3087161116 | 5.0055533508  |
| O186  | 4.8370553382  | -1.2707680984 | 3.6559610916  |
| O187  | 7.2596369232  | -2.2023016812 | 1.8145160652  |
| H188  | 7.1496300927  | -2.1913944846 | 2.7842241550  |
| H189  | 6.4285861152  | -2.6569131050 | 1.5219485765  |
| O190  | 1.2122212907  | 1.2819780583  | 6.8326837195  |
| H191  | 0.5625553841  | 0.9895178407  | 6.1344625335  |
| H192  | 1.0302991442  | 0.7809748925  | 7.6459540194  |
| O193  | 3.1966173650  | 3.0311000363  | 8.4707104262  |
| H194  | 3.9572963802  | 3.1249596325  | 9.0811823962  |
| H195  | 2.5649633807  | 2.4851703458  | 8.9772892505  |
| O196  | 5.4017167404  | 2.3990997054  | 10.0839000624 |
| H197  | 5.3580101104  | 1.5545948367  | 9.5801756479  |
| H198  | 5.9982478895  | 2.2240758371  | 10.8363501911 |
| O199  | 2.8477756348  | -1.8786471498 | 2.0443306739  |
| H200  | 3.5475063799  | -2.5618440182 | 1.8392528722  |
| H201  | 0.9985713326  | -5.1590306354 | 6.0679380275  |
| O202  | 1.3438902943  | -5.1793050225 | 2.0962207774  |
| H203  | 2.2572245657  | -5.0762404941 | 1.7461434735  |
| H204  | 0.8549261913  | -4.3259089708 | 1.9540727276  |
| O205  | 0.2245883351  | -2.7132964787 | 1.8160107792  |
| H206  | 1.0777249185  | -2.3243206230 | 1.5259937659  |
| H207  | 0.2722791223  | -2.4516365085 | 2.7618624160  |
| O208  | 3.2971354159  | -8.2092881184 | 0.9353364468  |
| H209  | 3.5738438840  | -7.2564865778 | 0.8520387857  |
| H210  | 4.0040425177  | -8.6142470385 | 1.4593748721  |
| O211  | 1.3748114461  | -4.2532133153 | 6.0759346519  |
| H212  | 1.7831309938  | -4.1729828462 | 5.1940734823  |
| H213  | 9.1361455401  | -5.2124465924 | 10.5753916428 |
| O214  | 2.4394969960  | -2.1184297986 | 7.7023601433  |
| H215  | 2.1839297129  | -3.0283666835 | 7.4366717093  |
| H216  | 2.6747512531  | -1.6998806214 | 6.8279013713  |
| O217  | -0.3377814085 | 0.4629460317  | 4.8256299514  |
| H218  | -1.2106100849 | 0.1097311374  | 5.0547382459  |
| H219  | 0.2033647257  | -0.3257686062 | 4.5307963430  |

Structure used in Fig 5 (the same atoms are frozen):

|     |               |               |               |
|-----|---------------|---------------|---------------|
| Mn1 | 3.0916990000  | -1.4644540000 | 3.7582700000  |
| Mn2 | 4.4225500000  | -1.2965850000 | 9.1511880000  |
| Mn3 | 5.3415790000  | -1.5469290000 | 5.3930810000  |
| Mn4 | 6.6191880000  | -0.1220860000 | 7.4086280000  |
| O5  | 3.5989050000  | -1.1898500000 | 5.6655650000  |
| O6  | 5.8295760000  | 0.1802450000  | 5.8216430000  |
| O7  | 5.1444210000  | 0.2843610000  | 8.3769150000  |
| O8  | 6.0205860000  | -1.8289240000 | 7.3046050000  |
| Ca9 | 3.8143040000  | 1.3715530000  | 6.6161370000  |
| C10 | 0.6675460000  | 1.9515080000  | 1.7063480000  |
| H11 | 1.2251840000  | 1.9058030000  | 0.7825780000  |
| H12 | -0.3243900000 | 2.3686420000  | 1.6143240000  |
| H13 | 0.4748430000  | 0.8952810000  | 1.9404300000  |
| C14 | 1.4715480000  | 2.5251930000  | 2.8780840000  |
| H15 | 0.7899740000  | 2.8374120000  | 3.6803940000  |
| H16 | 2.0363380000  | 3.4256200000  | 2.6066960000  |
| C17 | 2.4660260000  | 1.5849970000  | 3.5929780000  |
| O18 | 3.1594350000  | 2.0934070000  | 4.5064460000  |
| O19 | 2.4942350000  | 0.3589240000  | 3.2308330000  |
| C20 | 1.0582600000  | 1.1829960000  | 13.4563130000 |
| H21 | 0.3702240000  | 0.3601390000  | 13.5824630000 |
| H22 | 0.7336470000  | 2.1291270000  | 13.8635790000 |
| H23 | 2.0343900000  | 0.9055190000  | 13.8681030000 |
| C24 | 1.0755430000  | 1.3643610000  | 11.9216030000 |
| H25 | 1.8998980000  | 2.0031940000  | 11.5880200000 |
| H26 | 0.1496540000  | 1.8849440000  | 11.6452600000 |
| C27 | 1.1191420000  | 0.0200210000  | 11.1720300000 |
| H28 | 0.5823860000  | 0.1092620000  | 10.2162270000 |
| H29 | 0.6205980000  | -0.7723870000 | 11.7395870000 |
| C30 | 2.5099380000  | -0.4327490000 | 10.7823170000 |
| O31 | 3.2497280000  | 0.4118950000  | 10.1669370000 |
| O32 | 2.8971920000  | -1.6182570000 | 10.9348700000 |
| C33 | 2.7844500000  | -7.8608080000 | 8.6257440000  |
| H34 | 2.4431740000  | -8.8410200000 | 8.9828500000  |
| H35 | 1.9642060000  | -7.4257830000 | 8.0464800000  |
| C36 | 4.0143800000  | -8.0647780000 | 7.7373190000  |
| O37 | 5.1516070000  | -8.1915190000 | 8.2364110000  |
| C38 | 3.1212720000  | -6.9903730000 | 9.8736280000  |
| H39 | 3.8454310000  | -7.5441090000 | 10.4837660000 |
| H40 | 2.2157320000  | -6.8694870000 | 10.4760610000 |
| C41 | 3.6767360000  | -5.6291180000 | 9.5467360000  |
| N42 | 4.7126660000  | -5.5201530000 | 8.6361910000  |
| H43 | 5.2185230000  | -6.3285780000 | 8.2759930000  |
| C44 | 3.3860160000  | -4.3286520000 | 9.9016200000  |
| H45 | 2.6499270000  | -3.9375190000 | 10.5853580000 |
| C46 | 4.9789480000  | -4.2231100000 | 8.4300530000  |
| H47 | 5.6234750000  | -3.8669040000 | 7.6517120000  |
| N48 | 4.2171220000  | -3.4623510000 | 9.2024840000  |
| N49 | 3.8125020000  | -7.9758670000 | 6.4120960000  |
| H50 | 2.8522110000  | -7.8647600000 | 6.0553240000  |



|      |               |               |               |
|------|---------------|---------------|---------------|
| C51  | 4.9172530000  | -7.8463450000 | 5.4688660000  |
| H52  | 4.6390370000  | -8.3734960000 | 4.5484840000  |
| H53  | 5.7884490000  | -8.3445130000 | 5.8991680000  |
| C54  | 5.2570560000  | -6.3687050000 | 5.1535620000  |
| H55  | 6.1155930000  | -6.3482810000 | 4.4692070000  |
| H56  | 5.5923280000  | -5.8822900000 | 6.0736850000  |
| C57  | 4.0880820000  | -5.5755230000 | 4.5471800000  |
| H58  | 3.1414870000  | -5.8371810000 | 5.0378060000  |
| H59  | 3.9441980000  | -5.8184170000 | 3.4872470000  |
| C60  | 4.1921160000  | -4.0568330000 | 4.6177460000  |
| O61  | 3.2640460000  | -3.4209130000 | 4.0362190000  |
| O62  | 5.1482650000  | -3.5183410000 | 5.2579410000  |
| C63  | 9.1595120000  | 0.1191580000  | 11.4478230000 |
| H64  | 9.7626090000  | -0.1396350000 | 10.5717720000 |
| H65  | 9.7840190000  | -0.0451290000 | 12.3364210000 |
| C66  | 7.9230000000  | -0.7712580000 | 11.5357170000 |
| H67  | 7.2561630000  | -0.4298650000 | 12.3319200000 |
| H68  | 8.2148890000  | -1.7990110000 | 11.7901970000 |
| C69  | 7.1070080000  | -0.8370230000 | 10.2492640000 |
| O70  | 7.6219850000  | -0.4035960000 | 9.1886480000  |
| O71  | 5.9641120000  | -1.4014140000 | 10.3597670000 |
| C72  | 8.7904660000  | 1.6018530000  | 11.4160170000 |
| O73  | 7.7086580000  | 2.0117100000  | 11.8423370000 |
| N74  | 9.7693600000  | 2.4265090000  | 10.9604200000 |
| H75  | 10.5576490000 | 2.0131980000  | 10.4796360000 |
| C76  | 9.5677770000  | 3.8588150000  | 10.7651890000 |
| H77  | 10.4702310000 | 4.3977970000  | 11.0625750000 |
| H78  | 8.7334420000  | 4.1566880000  | 11.4027830000 |
| C79  | 9.3090160000  | 4.1500090000  | 9.2758270000  |
| O80  | 10.2433780000 | 4.3910750000  | 8.5153890000  |
| N81  | 8.0075700000  | 4.0714220000  | 8.8999620000  |
| H82  | 7.3036270000  | 3.7000780000  | 9.5388710000  |
| C83  | 7.6129340000  | 4.0771710000  | 7.5045480000  |
| H84  | 6.9909700000  | 4.9474120000  | 7.2714540000  |
| H85  | 8.5300110000  | 4.1222880000  | 6.9080760000  |
| C86  | 6.8131870000  | 2.8137970000  | 7.1529540000  |
| O87  | 5.7120190000  | 2.9459030000  | 6.5780620000  |
| O88  | 7.3655390000  | 1.7074750000  | 7.4992100000  |
| C89  | 11.5816620000 | -0.6170840000 | 3.4808990000  |
| H90  | 12.4441750000 | -1.2180930000 | 3.7284030000  |
| H91  | 11.8304270000 | 0.3821370000  | 3.1552080000  |
| H92  | 11.1225310000 | -1.0974230000 | 2.6052580000  |
| C93  | 10.5291820000 | -0.4716040000 | 4.5824490000  |
| H94  | 9.8894640000  | 0.3829580000  | 4.3294980000  |
| H95  | 10.9798410000 | -0.2284610000 | 5.5505390000  |
| C96  | 9.6426650000  | -1.7130040000 | 4.6972520000  |
| H97  | 10.1883460000 | -2.5042980000 | 5.2279790000  |
| H98  | 9.4031400000  | -2.1072790000 | 3.7056210000  |
| C99  | 8.3239140000  | -1.4252430000 | 5.3982480000  |
| O100 | 7.2911280000  | -1.9038780000 | 4.8394070000  |
| O101 | 8.3470820000  | -0.7393330000 | 6.4658700000  |
| C102 | 10.8187240000 | 4.2285680000  | -0.8150210000 |
| H103 | 11.5403640000 | 3.4839220000  | -0.5131310000 |
| H104 | 11.2010930000 | 5.2306260000  | -0.6882230000 |
| H105 | 10.6605360000 | 4.0997230000  | -1.8930330000 |
| C106 | 9.4990630000  | 3.9988860000  | -0.0643000000 |
| H107 | 9.0350290000  | 3.0888330000  | -0.4717880000 |
| H108 | 8.7952820000  | 4.8171290000  | -0.2687000000 |
| C109 | 9.6963220000  | 3.8498300000  | 1.4506670000  |
| H110 | 10.1292310000 | 4.7739020000  | 1.8550100000  |
| H111 | 10.4210460000 | 3.0493290000  | 1.6510470000  |
| C112 | 8.4139270000  | 3.5575050000  | 2.2373460000  |
| H113 | 7.6891500000  | 4.3733000000  | 2.0884620000  |
| H114 | 8.6468380000  | 3.5112850000  | 3.3060760000  |
| N115 | 7.8277710000  | 2.2720070000  | 1.8585770000  |
| H116 | 7.8386870000  | 2.0203520000  | 0.8799410000  |
| C117 | 6.9781550000  | 1.5537770000  | 2.6319140000  |
| N118 | 6.5853300000  | 2.0254820000  | 3.8188530000  |
| H119 | 6.1997940000  | 1.3835140000  | 4.5235780000  |
| H120 | 6.5722190000  | 3.0089400000  | 4.0418170000  |
| N121 | 6.5389890000  | 0.3697900000  | 2.2111920000  |
| H122 | 7.1052040000  | -0.3127960000 | 1.6936940000  |
| H123 | 5.8138230000  | -0.1130070000 | 2.7677620000  |
| C124 | 11.8423980000 | -5.3930890000 | 7.2492550000  |
| H125 | 11.2522020000 | -5.9724610000 | 6.5547080000  |
| H126 | 12.7964630000 | -5.8524490000 | 7.4617420000  |
| H127 | 12.0286400000 | -4.4049360000 | 6.8144700000  |
| C128 | 11.1319330000 | -5.2806700000 | 8.6126410000  |
| H129 | 11.7927190000 | -4.7447380000 | 9.3092380000  |
| H130 | 11.0040320000 | -6.2878760000 | 9.0333410000  |
| C131 | 9.8055350000  | -4.5867740000 | 8.5991340000  |
| N132 | 9.0086120000  | -4.4967660000 | 9.7373100000  |
| C133 | 9.1282530000  | -3.8817890000 | 7.6424350000  |
| H134 | 9.3746830000  | -3.7133950000 | 6.6107310000  |
| C135 | 7.9114120000  | -3.7673070000 | 9.4694390000  |
| H136 | 7.1164010000  | -3.5273850000 | 10.1595780000 |
| N137 | 7.9744560000  | -3.3772020000 | 8.2041390000  |
| H138 | 7.2256370000  | -2.7308540000 | 7.7376870000  |
| C139 | 6.0989350000  | -4.2351880000 | -1.2221970000 |
| H140 | 5.3833630000  | -4.5684340000 | -1.9592870000 |
| H141 | 7.1094170000  | -4.1301810000 | -1.5886720000 |
| H142 | 5.7967000000  | -3.2230750000 | -0.9292710000 |
| C143 | 5.9985700000  | -5.1396870000 | 0.0278510000  |

|      |               |                |               |
|------|---------------|----------------|---------------|
| H144 | 5.9021040000  | -6.1952070000  | -0.2472700000 |
| H145 | 6.9042220000  | -5.0229950000  | 0.6357750000  |
| C146 | 4.8136860000  | -4.6907270000  | 0.8965650000  |
| O147 | 4.9068330000  | -3.5131430000  | 1.3515650000  |
| O148 | 3.8295660000  | -5.4654410000  | 1.0995750000  |
| C149 | -1.8288750000 | -11.9867170000 | 4.2485690000  |
| H150 | -2.3586930000 | -12.7180950000 | 3.6563000000  |
| H151 | -2.3284070000 | -11.7832510000 | 5.1842340000  |
| H152 | -0.8540910000 | -12.4208340000 | 4.5101400000  |
| C153 | -1.6299660000 | -10.6735540000 | 3.4554040000  |
| H154 | -2.5623420000 | -10.4346880000 | 2.9228830000  |
| H155 | -1.4526150000 | -9.8467160000  | 4.1538920000  |
| C156 | -0.4618480000 | -10.7428670000 | 2.4517950000  |
| H157 | 0.4842570000  | -10.6294390000 | 2.9994330000  |
| H158 | -0.4298670000 | -11.7464660000 | 2.0040290000  |
| C159 | -0.5297280000 | -9.7418160000  | 1.2816430000  |
| H160 | 0.3026020000  | -9.9323820000  | 0.5896210000  |
| H161 | -1.4472780000 | -9.9433520000  | 0.7113500000  |
| C162 | -0.5517630000 | -8.2435050000  | 1.6052990000  |
| H163 | -0.7869160000 | -7.6813900000  | 0.6968020000  |
| H164 | -1.3103720000 | -7.9992030000  | 2.3539800000  |
| N165 | 0.7449030000  | -7.6997460000  | 2.1150310000  |
| H166 | 0.7861360000  | -6.6468900000  | 1.9886530000  |
| H167 | 0.8595700000  | -7.8553210000  | 3.1441820000  |
| H168 | 1.5895270000  | -8.0474610000  | 1.6035830000  |
| C169 | -1.8652230000 | -2.8063900000  | 9.6692390000  |
| H170 | -2.8449960000 | -3.2600300000  | 9.6435890000  |
| H171 | -1.9204760000 | -1.8064530000  | 10.0735590000 |
| H172 | -1.2498370000 | -3.3996090000  | 10.3585490000 |
| C173 | -1.2634660000 | -2.8359550000  | 8.2537000000  |
| H174 | -0.2622160000 | -2.3811400000  | 8.2879600000  |
| C175 | -2.1214110000 | -2.0214170000  | 7.2736060000  |
| H176 | -2.1830040000 | -0.9649890000  | 7.5697810000  |
| H177 | -3.1478900000 | -2.4086300000  | 7.2318990000  |
| H178 | -1.7158060000 | -2.0857190000  | 6.2556000000  |
| C179 | -1.1098330000 | -4.2830530000  | 7.7635620000  |
| H180 | -0.4288170000 | -4.8496670000  | 8.4102400000  |
| H181 | -0.7217370000 | -4.3250670000  | 6.7405440000  |
| H182 | -2.0785140000 | -4.8010580000  | 7.7681490000  |
| C183 | 0.8714020000  | -7.5684410000  | 5.2556630000  |
| O184 | 1.2174790000  | -1.7759780000  | 4.1866690000  |
| H185 | 0.6763620000  | -0.8523180000  | 4.7871040000  |
| O186 | 4.9273180000  | -1.2808220000  | 3.6820760000  |
| O187 | 7.3571280000  | -2.2608890000  | 1.8386280000  |
| H188 | 7.2441990000  | -2.2520040000  | 2.8074420000  |
| H189 | 6.5079910000  | -2.6725480000  | 1.5386460000  |
| O190 | 1.5769050000  | 0.6915380000   | 7.2495070000  |
| H191 | 2.2224860000  | -0.5795820000  | 7.9489440000  |
| O192 | 3.1824500000  | 2.6684910000   | 8.6626050000  |
| H193 | 3.9311100000  | 3.1187760000   | 9.1023790000  |
| H194 | 3.0222900000  | 1.9158010000   | 9.2879430000  |
| O195 | 5.6524590000  | 2.6620640000   | 9.9913030000  |
| H196 | 5.5526840000  | 1.7922830000   | 9.5421040000  |
| H197 | 6.0378750000  | 2.4481910000   | 10.8616560000 |
| O198 | 2.9591470000  | -1.8250330000  | 2.0218350000  |
| H199 | 3.6427400000  | -2.5231450000  | 1.7873920000  |
| H200 | 0.6184830000  | -5.2206680000  | 4.9037410000  |
| O201 | 1.1002750000  | -4.9873690000  | 1.8478480000  |
| H202 | 2.0737500000  | -4.9356190000  | 1.6895960000  |
| H203 | 0.9387150000  | -4.7583740000  | 2.8072380000  |
| O204 | 0.2877340000  | -2.2081560000  | 1.6628810000  |
| H205 | 0.3611760000  | -3.1839550000  | 1.5848160000  |
| H206 | 0.7449530000  | -1.9038960000  | 3.3096240000  |
| O207 | 3.1983220000  | -8.0750490000  | 0.7818420000  |
| H208 | 3.4860660000  | -7.1201070000  | 0.7617790000  |
| H209 | 3.8739890000  | -8.5116400000  | 1.3216110000  |
| O210 | 0.3327210000  | -4.4547510000  | 4.3650760000  |
| H211 | 0.8475200000  | -3.6622290000  | 4.6244670000  |
| H212 | 1.2043510000  | -1.9214850000  | 1.4541480000  |
| H213 | 9.2070670000  | -4.9296720000  | 10.6296160000 |
| O214 | 2.8105620000  | -1.4129400000  | 8.0275850000  |
| H215 | 3.0760800000  | -1.5671590000  | 7.0490970000  |
| H216 | 1.1304540000  | 1.3476440000   | 7.8061340000  |
| O217 | 0.1405170000  | 0.0250450000   | 5.4118090000  |
| H218 | -0.6944390000 | -0.3431060000  | 5.7431280000  |
| H219 | 0.8142110000  | 0.3436600000   | 6.3463470000  |

Structure used in Fig 6 (the same atoms are frozen):

|     |              |               |              |
|-----|--------------|---------------|--------------|
| Mn1 | 3.1264390000 | -1.4521340000 | 3.6070030000 |
| Mn2 | 4.5245470000 | -1.2366030000 | 8.8440340000 |
| Mn3 | 5.2984120000 | -1.4517440000 | 5.3077780000 |
| Mn4 | 6.6613430000 | 0.0336030000  | 7.2801830000 |
| O5  | 3.5107730000 | -1.2266690000 | 5.4171390000 |
| O6  | 5.7345430000 | 0.2638770000  | 5.7089700000 |
| O7  | 5.3866160000 | 0.6158100000  | 8.3011520000 |
| O8  | 5.8991710000 | -1.6856100000 | 7.2202540000 |
| Ca9 | 3.6883580000 | 1.4934750000  | 6.8532900000 |
| C10 | 0.6675460000 | 1.9515080000  | 1.7063480000 |
| H11 | 1.2251840000 | 1.9058030000  | 0.7825780000 |

|      |               |               |               |
|------|---------------|---------------|---------------|
| H12  | -0.3243900000 | 2.3686420000  | 1.6143240000  |
| H13  | 0.4609530000  | 0.8932290000  | 1.9194190000  |
| C14  | 1.4843230000  | 2.4743900000  | 2.9004800000  |
| H15  | 0.8117570000  | 2.7626160000  | 3.7167840000  |
| H16  | 2.0645000000  | 3.3730090000  | 2.6565830000  |
| C17  | 2.4714440000  | 1.4920640000  | 3.5812440000  |
| O18  | 3.1388540000  | 1.9000960000  | 4.5458150000  |
| O19  | 2.5148680000  | 0.2951750000  | 3.0913750000  |
| C20  | 1.0582600000  | 1.1829960000  | 13.4563130000 |
| H21  | 0.3702240000  | 0.3601390000  | 13.5824630000 |
| H22  | 0.7336470000  | 2.1291270000  | 13.8635790000 |
| H23  | 2.0254270000  | 0.9033040000  | 13.8890950000 |
| C24  | 1.1528740000  | 1.4189820000  | 11.9494380000 |
| H25  | 1.9470540000  | 2.1386870000  | 11.7246570000 |
| H26  | 0.2239510000  | 1.8860810000  | 11.6012050000 |
| C27  | 1.3998680000  | 0.0998550000  | 11.1966060000 |
| H28  | 0.5190570000  | -0.1894160000 | 10.6082530000 |
| H29  | 1.6089970000  | -0.7181300000 | 11.8921880000 |
| C30  | 2.5605360000  | 0.2455730000  | 10.2466530000 |
| O31  | 2.5449560000  | 1.1801650000  | 9.4184480000  |
| O32  | 3.5067080000  | -0.6129620000 | 10.4011840000 |
| C33  | 2.7844500000  | -7.8608080000 | 8.6257440000  |
| H34  | 2.4565570000  | -8.8394910000 | 8.9990870000  |
| H35  | 1.9543630000  | -7.4375350000 | 8.0514620000  |
| C36  | 4.0077400000  | -8.0636220000 | 7.7324300000  |
| O37  | 5.1426410000  | -8.2092160000 | 8.2275680000  |
| C38  | 3.1318160000  | -6.9671060000 | 9.8492690000  |
| H39  | 3.8764520000  | -7.4984650000 | 10.4540210000 |
| H40  | 2.2380320000  | -6.8428200000 | 10.4682000000 |
| C41  | 3.6548360000  | -5.6133110000 | 9.4618130000  |
| N42  | 4.7082300000  | -5.5137940000 | 8.5694180000  |
| H43  | 5.2426580000  | -6.3196120000 | 8.2511630000  |
| C44  | 3.2866200000  | -4.3081740000 | 9.7088790000  |
| H45  | 2.5049680000  | -3.9303480000 | 10.3515290000 |
| C46  | 4.9019380000  | -4.2159800000 | 8.2735700000  |
| H47  | 5.5657080000  | -3.8606650000 | 7.5066330000  |
| N48  | 4.0785190000  | -3.4490840000 | 8.9662550000  |
| N49  | 3.8070640000  | -7.9476020000 | 6.4076370000  |
| H50  | 2.8512150000  | -7.8656640000 | 6.0420350000  |
| C51  | 4.9172530000  | -7.8463450000 | 5.4688660000  |
| H52  | 4.6320120000  | -8.3752920000 | 4.5519090000  |
| H53  | 5.7745530000  | -8.3612610000 | 5.9072920000  |
| C54  | 5.2952760000  | -6.3814620000 | 5.1355670000  |
| H55  | 6.1618220000  | -6.3892890000 | 4.4620320000  |
| H56  | 5.6251000000  | -5.8814400000 | 6.0498620000  |
| C57  | 4.1427490000  | -5.5909990000 | 4.5011640000  |
| H58  | 3.2032180000  | -5.8582710000 | 5.0018430000  |
| H59  | 4.0036650000  | -5.8620330000 | 3.4474870000  |
| C60  | 4.2291930000  | -4.0659410000 | 4.5432550000  |
| O61  | 3.2712900000  | -3.4617680000 | 3.9491350000  |
| O62  | 5.1636660000  | -3.4964050000 | 5.1646650000  |
| C63  | 9.1595120000  | 0.1191580000  | 11.4478230000 |
| H64  | 9.8436150000  | -0.1154800000 | 10.6253260000 |
| H65  | 9.7046100000  | -0.0562840000 | 12.3854600000 |
| C66  | 7.9342610000  | -0.7901920000 | 11.4082530000 |
| H67  | 7.1993020000  | -0.4638500000 | 12.1499400000 |
| H68  | 8.2170130000  | -1.8156560000 | 11.6826510000 |
| C69  | 7.2041940000  | -0.8645110000 | 10.0678650000 |
| O70  | 7.7340940000  | -0.3410650000 | 9.0496200000  |
| O71  | 6.1108350000  | -1.5191340000 | 10.0895040000 |
| C72  | 8.7835750000  | 1.5999160000  | 11.4140880000 |
| O73  | 7.6912260000  | 2.0030470000  | 11.8191080000 |
| N74  | 9.7718200000  | 2.4304800000  | 10.9850050000 |
| H75  | 10.5678230000 | 2.0187380000  | 10.5152120000 |
| C76  | 9.5677770000  | 3.8588150000  | 10.7651890000 |
| H77  | 10.4400250000 | 4.4141860000  | 11.1182130000 |
| H78  | 8.6861030000  | 4.1513520000  | 11.3381070000 |
| C79  | 9.4170750000  | 4.1217190000  | 9.2508280000  |
| O80  | 10.4152060000 | 4.3025360000  | 8.5556820000  |
| N81  | 8.1437750000  | 4.0830740000  | 8.7838780000  |
| H82  | 7.3771880000  | 3.7661140000  | 9.3842790000  |
| C83  | 7.8397550000  | 4.0978040000  | 7.3617060000  |
| H84  | 7.2770900000  | 4.9973910000  | 7.0914500000  |
| H85  | 8.7947560000  | 4.0901470000  | 6.8276590000  |
| C86  | 6.9931690000  | 2.8722450000  | 6.9676840000  |
| O87  | 5.8617840000  | 3.0348600000  | 6.4808000000  |
| O88  | 7.5709900000  | 1.7392490000  | 7.2012810000  |
| C89  | 11.5816620000 | -0.6170830000 | 3.4808990000  |
| H90  | 12.4441750000 | -1.2180930000 | 3.7284030000  |
| H91  | 11.8304270000 | 0.3821370000  | 3.1552080000  |
| H92  | 11.1464530000 | -1.0901160000 | 2.5882550000  |
| C93  | 10.5135450000 | -0.5291990000 | 4.5672890000  |
| H94  | 9.9229620000  | 0.3808240000  | 4.4083600000  |
| H95  | 10.9477200000 | -0.4237540000 | 5.5669870000  |
| C96  | 9.5592770000  | -1.7237750000 | 4.5139190000  |
| H97  | 10.0386710000 | -2.6252730000 | 4.9234060000  |
| H98  | 9.2999090000  | -1.9716760000 | 3.4803950000  |
| C99  | 8.2669290000  | -1.4339470000 | 5.2531930000  |
| O100 | 7.2030840000  | -1.8514410000 | 4.7016320000  |
| O101 | 8.3337890000  | -0.7931070000 | 6.3393950000  |
| C102 | 10.8187240000 | 4.2285680000  | -0.8150210000 |
| H103 | 11.5403640000 | 3.4839220000  | -0.5131310000 |
| H104 | 11.2010930000 | 5.2306260000  | -0.6882230000 |

|      |               |                |               |
|------|---------------|----------------|---------------|
| H105 | 10.6699980000 | 4.0998030000   | -1.8948140000 |
| C106 | 9.4885060000  | 4.0057810000   | -0.0841110000 |
| H107 | 9.0418510000  | 3.0827430000   | -0.4812850000 |
| H108 | 8.7835810000  | 4.8130460000   | -0.3253540000 |
| C109 | 9.6469690000  | 3.8956300000   | 1.4385280000  |
| H110 | 10.0698690000 | 4.8293650000   | 1.8308200000  |
| H111 | 10.3641440000 | 3.0993600000   | 1.6786060000  |
| C112 | 8.3399570000  | 3.6245630000   | 2.1927130000  |
| H113 | 7.6301670000  | 4.4490390000   | 2.0213750000  |
| H114 | 8.5441340000  | 3.5803040000   | 3.2675660000  |
| N115 | 7.7525500000  | 2.3460350000   | 1.7974110000  |
| H116 | 7.7938950000  | 2.0971390000   | 0.8191130000  |
| C117 | 6.8575570000  | 1.6401520000   | 2.5306250000  |
| N118 | 6.4059480000  | 2.1075120000   | 3.6929530000  |
| H119 | 6.0044110000  | 1.4672340000   | 4.3932540000  |
| H120 | 6.4821170000  | 3.0752480000   | 3.9659930000  |
| N121 | 6.4172860000  | 0.4675720000   | 2.0693970000  |
| H122 | 7.0078670000  | -0.2060620000  | 1.5723240000  |
| H123 | 5.7003960000  | -0.0290230000  | 2.6214030000  |
| C124 | 11.8423980000 | -5.3930890000  | 7.2492550000  |
| H125 | 11.2522020000 | -5.9724610000  | 6.5547080000  |
| H126 | 12.7964630000 | -5.8524490000  | 7.4617420000  |
| H127 | 12.0392320000 | -4.4124760000  | 6.8012820000  |
| C128 | 11.1066220000 | -5.2515650000  | 8.5974570000  |
| H129 | 11.7600150000 | -4.7249700000  | 9.3078000000  |
| H130 | 10.9490610000 | -6.2532540000  | 9.0205040000  |
| C131 | 9.7837360000  | -4.5429000000  | 8.5533680000  |
| N132 | 8.8577790000  | -4.6616330000  | 9.5879570000  |
| C133 | 9.2139300000  | -3.6612080000  | 7.6752970000  |
| H134 | 9.5888760000  | -3.2666130000  | 6.7494960000  |
| C135 | 7.7858940000  | -3.8911220000  | 9.3396270000  |
| H136 | 6.9237260000  | -3.7541820000  | 9.9733880000  |
| N137 | 7.9860770000  | -3.2781430000  | 8.1792840000  |
| H138 | 7.2775740000  | -2.6143160000  | 7.7388540000  |
| C139 | 6.0989350000  | -4.2351880000  | -1.2221970000 |
| H140 | 5.3833630000  | -4.5684340000  | -1.9592870000 |
| H141 | 7.1094170000  | -4.1301810000  | -1.5886720000 |
| H142 | 5.7919270000  | -3.2381360000  | -0.8899550000 |
| C143 | 6.0264560000  | -5.2072610000  | -0.0187410000 |
| H144 | 5.9726190000  | -6.2479570000  | -0.3558340000 |
| H145 | 6.9230380000  | -5.0895790000  | 0.6014480000  |
| C146 | 4.8234640000  | -4.8437460000  | 0.8570010000  |
| O147 | 4.8921520000  | -3.7110230000  | 1.4043110000  |
| O148 | 3.8378380000  | -5.6442300000  | 0.9764480000  |
| C149 | -1.8288750000 | -11.9867170000 | 4.2485690000  |
| H150 | -2.3586930000 | -12.7180950000 | 3.6563000000  |
| H151 | -2.3284070000 | -11.7832500000 | 5.1842340000  |
| H152 | -0.8575010000 | -12.4267970000 | 4.5134930000  |
| C153 | -1.6133010000 | -10.6921900000 | 3.4335700000  |
| H154 | -2.5561500000 | -10.4227580000 | 2.9349230000  |
| H155 | -1.3689640000 | -9.8630960000  | 4.1083030000  |
| C156 | -0.4911310000 | -10.8405820000 | 2.3854540000  |
| H157 | 0.4800380000  | -10.7314390000 | 2.8881640000  |
| H158 | -0.5058300000 | -11.8644790000 | 1.9858310000  |
| C159 | -0.5756510000 | -9.8984980000  | 1.1690160000  |
| H160 | 0.2289700000  | -10.1426390000 | 0.4612900000  |
| H161 | -1.5155860000 | -10.1032190000 | 0.6378970000  |
| C162 | -0.5541750000 | -8.3877760000  | 1.4201280000  |
| H163 | -0.7783930000 | -7.8600510000  | 0.4886200000  |
| H164 | -1.2990080000 | -8.0894070000  | 2.1631210000  |
| N165 | 0.7619550000  | -7.8604640000  | 1.8994290000  |
| H166 | 0.8067040000  | -6.8145290000  | 1.7828570000  |
| H167 | 0.8978910000  | -8.0273200000  | 2.9236680000  |
| H168 | 1.5945620000  | -8.2081490000  | 1.3631530000  |
| C169 | -1.8652230000 | -2.8063900000  | 9.6692390000  |
| H170 | -2.8449960000 | -3.2600300000  | 9.6435890000  |
| H171 | -1.9204750000 | -1.8064530000  | 10.0735580000 |
| H172 | -1.2550360000 | -3.4026830000  | 10.3610890000 |
| C173 | -1.2227720000 | -2.7852740000  | 8.2712830000  |
| H174 | -0.2251090000 | -2.3313630000  | 8.3689510000  |
| C175 | -2.0363190000 | -1.9139460000  | 7.3023110000  |
| H176 | -2.1856650000 | -0.9032150000  | 7.7030750000  |
| H177 | -3.0269830000 | -2.3498490000  | 7.1169040000  |
| H178 | -1.5234780000 | -1.8199860000  | 6.3370050000  |
| C179 | -1.0399360000 | -4.2049390000  | 7.7171080000  |
| H180 | -0.4197020000 | -4.8144390000  | 8.3861270000  |
| H181 | -0.5580150000 | -4.1949340000  | 6.7329060000  |
| H182 | -2.0079510000 | -4.7125260000  | 7.6087240000  |
| C183 | 0.8633680000  | -7.7200000000  | 5.0469090000  |
| O184 | 1.1014380000  | -1.7905240000  | 3.8604860000  |
| H185 | 0.9329270000  | -2.5802220000  | 4.4076020000  |
| O186 | 4.9122060000  | -1.2630520000  | 3.5359100000  |
| O187 | 7.2695700000  | -2.2023040000  | 1.7557310000  |
| H188 | 7.1497170000  | -2.1536790000  | 2.7234730000  |
| H189 | 6.4552580000  | -2.6871160000  | 1.4827140000  |
| O190 | 1.2557420000  | 1.6339220000   | 6.9978010000  |
| H191 | 1.1551430000  | 1.2295780000   | 7.8782720000  |
| O192 | 3.4948760000  | 3.5069830000   | 8.3626130000  |
| H193 | 4.3035080000  | 3.5497570000   | 8.9167060000  |
| H194 | 2.8553010000  | 3.0758390000   | 8.9609060000  |
| O195 | 5.7726240000  | 2.8184140000   | 9.8861920000  |
| H196 | 5.7035100000  | 1.9614260000   | 9.3876760000  |
| H197 | 6.1202910000  | 2.5711290000   | 10.7640370000 |

|      |               |               |               |
|------|---------------|---------------|---------------|
| O198 | 3.0122540000  | -1.8487570000 | 1.7933690000  |
| H199 | 3.6553090000  | -2.5891020000 | 1.6223040000  |
| H200 | 0.6815910000  | -5.5340430000 | 4.7411150000  |
| O201 | 1.1965140000  | -5.1100790000 | 1.6927760000  |
| H202 | 2.1759890000  | -5.1396050000 | 1.5060240000  |
| H203 | 1.0947260000  | -4.9510680000 | 2.6678390000  |
| O204 | 0.6524760000  | -2.3772930000 | 1.5502590000  |
| H205 | 0.6502070000  | -3.3658610000 | 1.4634350000  |
| H206 | 0.7054720000  | -2.1169420000 | 2.7000850000  |
| O207 | 3.1519010000  | -8.2113960000 | 0.4925950000  |
| H208 | 3.4800400000  | -7.2700080000 | 0.5354600000  |
| H209 | 3.8427690000  | -8.7245180000 | 0.9374410000  |
| O210 | 0.7940800000  | -4.6282650000 | 4.3604280000  |
| H211 | 1.7419700000  | -4.4076330000 | 4.4541010000  |
| H212 | 1.6832710000  | -2.1372070000 | 1.4411690000  |
| H213 | 8.9607190000  | -5.2522210000 | 10.4026870000 |
| O214 | 3.0661030000  | -0.9095780000 | 7.8482980000  |
| H215 | 3.1033330000  | -1.3795370000 | 6.9799440000  |
| H216 | 0.7023640000  | 1.1171560000  | 6.3589290000  |
| O217 | -0.1196910000 | 0.3418640000  | 5.0401940000  |
| H218 | -1.0433600000 | 0.0719950000  | 5.1429140000  |
| H219 | 0.3370040000  | -0.4250610000 | 4.6040150000  |

Fully optimized structure for eT (small model, nothing frozen):

|     |              |               |               |
|-----|--------------|---------------|---------------|
| Mn1 | 3.5194270000 | -1.3620120000 | 3.4548930000  |
| Mn2 | 4.3889190000 | -1.2232320000 | 8.7964620000  |
| Mn3 | 5.5220360000 | -1.5359350000 | 5.3049820000  |
| Mn4 | 6.6251660000 | -0.0998730000 | 7.4173610000  |
| O5  | 3.7420150000 | -1.1529790000 | 5.2695420000  |
| O6  | 5.9385060000 | 0.1757790000  | 5.7306900000  |
| O7  | 5.1654190000 | 0.4085630000  | 8.3314860000  |
| O8  | 5.7822200000 | -1.7328370000 | 7.2409760000  |
| Ca9 | 3.7155470000 | 1.3296850000  | 6.5820720000  |
| H10 | 2.5830660000 | 2.3512510000  | 2.4761330000  |
| C11 | 2.9952880000 | 1.6188710000  | 3.1972030000  |
| O12 | 3.2083920000 | 1.9982760000  | 4.3584000000  |
| O13 | 3.2101500000 | 0.4725640000  | 2.6815530000  |
| H14 | 1.4255910000 | -0.3753610000 | 11.2670160000 |
| C15 | 2.1415540000 | -0.0361190000 | 10.4901580000 |
| O16 | 1.8593470000 | 0.9954490000  | 9.8579050000  |
| O17 | 3.1746570000 | -0.7863020000 | 10.3925380000 |
| H18 | 2.8959160000 | -6.0001460000 | 10.5639740000 |
| C19 | 3.3211290000 | -5.2032040000 | 9.9743710000  |
| N20 | 4.1048570000 | -5.4451710000 | 8.8591670000  |
| H21 | 4.3602210000 | -6.3510200000 | 8.4937730000  |
| C22 | 3.2603520000 | -3.8421720000 | 10.0931350000 |
| H23 | 2.7697220000 | -3.2218460000 | 10.8261300000 |
| C24 | 4.4938220000 | -4.2546850000 | 8.3435990000  |
| H25 | 5.1076670000 | -4.1299750000 | 7.4629210000  |
| N26 | 3.9900920000 | -3.2714490000 | 9.0717480000  |
| H27 | 4.3261850000 | -5.1827220000 | 4.3263780000  |
| C28 | 4.3454640000 | -4.0788790000 | 4.3558640000  |
| O29 | 3.5674130000 | -3.4920130000 | 3.5520580000  |
| O30 | 5.1325720000 | -3.5634390000 | 5.1925320000  |
| H31 | 7.6461370000 | -1.2553850000 | 10.9738470000 |
| C32 | 7.0128730000 | -1.0971840000 | 10.0875540000 |
| O33 | 7.5676650000 | -0.5105390000 | 9.1182230000  |
| O34 | 5.8312790000 | -1.5289190000 | 10.1662880000 |
| H35 | 7.4647190000 | 3.6769840000  | 7.1113900000  |
| C36 | 6.8339670000 | 2.7763990000  | 6.9964760000  |
| O37 | 5.7253110000 | 2.8919750000  | 6.4373600000  |
| O38 | 7.3795590000 | 1.7193090000  | 7.4704890000  |
| H39 | 9.4117560000 | -1.9148520000 | 5.3621400000  |
| C40 | 8.4096800000 | -1.5742490000 | 5.6672260000  |
| O41 | 7.4414500000 | -2.0657190000 | 5.0213230000  |
| O42 | 8.3681790000 | -0.7428650000 | 6.6105680000  |
| H43 | 6.2893860000 | 3.8444020000  | 2.0555580000  |
| N44 | 6.3455800000 | 2.9264140000  | 1.6383710000  |
| H45 | 5.9340320000 | 2.8349200000  | 0.7210670000  |
| C46 | 6.3823600000 | 1.8387430000  | 2.4543370000  |
| N47 | 6.4903180000 | 2.0085460000  | 3.7680700000  |
| H48 | 6.4435360000 | 1.1994040000  | 4.4131390000  |
| H49 | 6.1856090000 | 2.8678710000  | 4.2119900000  |
| N50 | 6.4078520000 | 0.6150510000  | 1.9270460000  |
| H51 | 6.3091810000 | 0.5079510000  | 0.9274650000  |
| H52 | 6.0898220000 | -0.1885280000 | 2.5158300000  |
| O53 | 1.6024560000 | -1.5559970000 | 3.5563630000  |
| H54 | 1.4568570000 | -2.4970910000 | 3.7551250000  |
| O55 | 5.3553090000 | -1.3385160000 | 3.4995010000  |
| O56 | 1.3220550000 | 1.5483030000  | 7.0389880000  |
| H57 | 1.2279460000 | 1.3936860000  | 8.0001590000  |
| O58 | 3.6581600000 | 2.6811940000  | 8.6919860000  |
| H59 | 4.5062060000 | 2.3447150000  | 9.0328650000  |
| H60 | 2.9946620000 | 2.1872620000  | 9.2328020000  |
| O61 | 3.5422870000 | -1.8646250000 | 1.3536300000  |
| H62 | 3.5722640000 | -2.8363470000 | 1.3899900000  |
| O63 | 0.9992040000 | -1.2189330000 | 0.9769200000  |
| H64 | 0.3887020000 | -1.9270640000 | 0.7202060000  |
| H65 | 1.0076500000 | -1.2290470000 | 1.9766430000  |

|     |              |               |              |
|-----|--------------|---------------|--------------|
| H66 | 2.6239270000 | -1.6177130000 | 1.0215210000 |
| O67 | 2.9545530000 | -0.9669680000 | 7.6842840000 |
| H68 | 3.1463550000 | -1.4021010000 | 6.8208430000 |
| H69 | 0.8247160000 | 0.7989600000  | 6.6171520000 |
| O70 | 0.4567240000 | -0.8127290000 | 6.0212920000 |
| H71 | 1.0791710000 | -1.2040380000 | 6.6603670000 |
| H72 | 0.8631680000 | -0.9688000000 | 5.1342920000 |

## Structure of the large model including Tyr-His for the open cubane:

|     |                |                |                |
|-----|----------------|----------------|----------------|
| Mn1 | 2.8673575059   | -1.4699229440  | 4.0555788403   |
| Mn2 | 4.5765118204   | -1.4914177030  | 8.5817418925   |
| Mn3 | 5.2486527916   | -1.4416832935  | 5.4458849834   |
| Mn4 | 6.5676375121   | 0.0537876443   | 7.4032319581   |
| O5  | 3.6032878053   | -1.1778516981  | 6.0109415244   |
| O6  | 5.7356104711   | 0.3079074016   | 5.8513251664   |
| O7  | 5.0137758462   | 0.2974613437   | 8.3491799489   |
| O8  | 6.0131766681   | -1.7494954934  | 7.3514366430   |
| Ca9 | 3.4226936827   | 1.2981186736   | 6.7582713101   |
| C10 | 0.6675456172#  | 1.9515069323#  | 1.7063483214#  |
| H11 | 1.2251836749#  | 1.9058034500#  | 0.7825777324#  |
| H12 | -0.3243893748# | 2.3686424381#  | 1.6143237842#  |
| H13 | 0.4665984593   | 0.9008359137   | 1.9547732137   |
| C14 | 1.4870669844   | 2.5308315181   | 2.8740901247   |
| H15 | 0.8151638905   | 2.9456517818   | 3.6370542087   |
| H16 | 2.1258936075   | 3.3670774654   | 2.5667733962   |
| C17 | 2.3946805555   | 1.5683580369   | 3.6816971926   |
| O18 | 3.1623464078   | 2.0874355079   | 4.5287963400   |
| O19 | 2.2528166278   | 0.3161045296   | 3.4608144804   |
| C20 | 1.0582599918#  | 1.1829959896#  | 13.4563133369# |
| H21 | 0.3702238535#  | 0.3601391373#  | 13.5824630990# |
| H22 | 0.7336467543#  | 2.1291271189#  | 13.8635785272# |
| H23 | 1.9506572605   | 0.9063316468   | 14.0357574288  |
| C24 | 1.4469648593   | 1.2704302586   | 11.9678509004  |
| H25 | 2.2601813421   | 1.9941855668   | 11.8247833341  |
| H26 | 0.5987895198   | 1.6189945528   | 11.3643521968  |
| C27 | 1.8997150477   | -0.1015244676  | 11.4547797606  |
| H28 | 1.0594582153   | -0.8106916261  | 11.4729583660  |
| H29 | 2.6607205846   | -0.5268299985  | 12.1200682229  |
| C30 | 2.4729509027   | -0.1386432533  | 10.0445354310  |
| O31 | 2.3075351444   | 0.7829011965   | 9.2307970252   |
| O32 | 3.1190662656   | -1.2328590006  | 9.7813486834   |
| C33 | 2.7844501479#  | -7.8608080897# | 8.6257438687#  |
| H34 | 2.4683706465   | -8.8263630776  | 9.0399872444   |
| H35 | 1.9535404344   | -7.4740603950  | 8.0279956272   |
| C36 | 4.0173385782   | -8.0836001166  | 7.7430521868   |
| O37 | 5.1499248513   | -8.2432481862  | 8.2505676798   |
| C38 | 3.1019439196   | -6.9099071177  | 9.8147477392   |
| H39 | 3.7994868368   | -7.4215293221  | 10.4884144169  |
| H40 | 2.1835239810   | -6.7232217151  | 10.3789435895  |
| C41 | 3.6940974961   | -5.5991382571  | 9.3804168037   |
| N42 | 4.8595605334   | -5.599119237   | 8.6288909817   |
| H43 | 5.3581629811   | -6.4661670510  | 8.3961809517   |
| C44 | 3.3238000313   | -4.2773724758  | 9.4536994422   |
| H45 | 2.4875824363   | -3.8188877015  | 9.9551040752   |
| C46 | 5.1162385401   | -4.3538787285  | 8.2192808763   |
| H47 | 5.8803467175   | -4.0881513090  | 7.5140177999   |
| N48 | 4.2217459674   | -3.5118523337  | 8.7212186597   |
| N49 | 3.8194857939   | -7.9678558253  | 6.4216340642   |
| H50 | 2.8671999880   | -7.8311539675  | 6.0623855227   |
| C51 | 4.9172532358#  | -7.8463446973# | 5.4688659016#  |
| H52 | 4.6112758001   | -8.3500081785  | 4.5451031170   |
| H53 | 5.7816779164   | -8.3749092654  | 5.8756949311   |
| C54 | 5.2906971741   | -6.3707037051  | 5.1686736462   |
| H55 | 6.1369757513   | -6.3651473873  | 4.4697957874   |
| H56 | 5.6579656192   | -5.9132649537  | 6.0905550704   |
| C57 | 4.1261492362   | -5.5444687262  | 4.5955727846   |
| H58 | 3.1751317814   | -5.8623296216  | 5.0371380923   |
| H59 | 4.0094446029   | -5.7181821506  | 3.5163704912   |
| C60 | 4.1745356059   | -4.0343692160  | 4.7589452128   |
| O61 | 3.1322641588   | -3.4239040603  | 4.3457434993   |
| O62 | 5.1731785403   | -3.4532528591  | 5.2755289532   |
| C63 | 9.1595116146#  | 0.1191579976#  | 11.4478228126# |
| H64 | 9.8193256287   | -0.1559331395  | 10.6181532850  |
| H65 | 9.7364452940   | 0.0042580746   | 12.3754334218  |

|      |                |                |                |
|------|----------------|----------------|----------------|
| C66  | 7.9352852751   | -0.7889315452  | 11.4957424274  |
| H67  | 7.2462895404   | -0.4516926540  | 12.2762074954  |
| H68  | 8.2314426262   | -1.8099329675  | 11.7694522952  |
| C69  | 7.1316803701   | -0.8743028526  | 10.1973310163  |
| O70  | 7.5835035295   | -0.2522267410  | 9.1821118866   |
| O71  | 6.0958529091   | -1.5994439059  | 10.2265739784  |
| C72  | 8.7668911008   | 1.5938254467   | 11.3296825420  |
| O73  | 7.6497430751   | 2.0145765982   | 11.6528773598  |
| N74  | 9.7630192942   | 2.4225169988   | 10.9263279077  |
| H75  | 10.5993981472  | 2.0189554388   | 10.5263694619  |
| C76  | 9.5677770977#  | 3.8588145838#  | 10.7651885038# |
| H77  | 10.5180456602  | 4.3674059284   | 10.9375890465  |
| H78  | 8.8395926363   | 4.1795480632   | 11.5134004081  |
| C79  | 9.1051724626   | 4.2044405154   | 9.3322182815   |
| O80  | 9.9083774135   | 4.5256721684   | 8.4631783626   |
| N81  | 7.7590154520   | 4.1095533837   | 9.1330921561   |
| H82  | 7.1822052314   | 3.6859898283   | 9.8518126552   |
| C83  | 7.1703439782   | 4.2164300576   | 7.8120827187   |
| H84  | 6.4355134875   | 5.0264320279   | 7.7704989745   |
| H85  | 7.9867998781   | 4.4441831254   | 7.1192269412   |
| C86  | 6.4651765952   | 2.9234263841   | 7.3775029334   |
| O87  | 5.3182390710   | 2.9814382463   | 6.9048543035   |
| O88  | 7.1743310600   | 1.8543070998   | 7.5542430469   |
| C89  | 11.5816614725# | -0.6170833914# | 3.4808992123#  |
| H90  | 12.4441751965# | -1.2180927321# | 3.7284029654#  |
| H91  | 11.8304271141# | 0.3821369951#  | 3.1552080728#  |
| H92  | 11.1099034113  | -1.0978831042  | 2.6133390167   |
| C93  | 10.5438456503  | -0.4562244540  | 4.6071907961   |
| H94  | 9.9884745155   | 0.4732388850   | 4.4326667603   |
| H95  | 11.0247853947  | -0.3303266953  | 5.5837601207   |
| C96  | 9.5324961740   | -1.6040139805  | 4.6422436298   |
| H97  | 9.9820438630   | -2.5004398241  | 5.0935674034   |
| H98  | 9.2538941793   | -1.8988029474  | 3.6260489395   |
| C99  | 8.2290813998   | -1.2781920172  | 5.3616666044   |
| O100 | 7.1865032717   | -1.7460546200  | 4.8190535404   |
| O101 | 8.2723723021   | -0.5879050393  | 6.4363472713   |
| C102 | 10.8187240085# | 4.2285679563#  | -0.8150213674# |
| H103 | 11.5403644531# | 3.4839224590#  | -0.5131309518# |
| H104 | 11.2010928465# | 5.2306259492#  | -0.6882231379# |
| H105 | 10.6658376814  | 4.0997417471   | -1.8935129700  |
| C106 | 9.4870083616   | 3.9981422080   | -0.0774760545  |
| H107 | 9.0140668389   | 3.0999558411   | -0.5016473327  |
| H108 | 8.7959666847   | 4.8280361131   | -0.2793365358  |
| C109 | 9.6555261691   | 3.8263290925   | 1.4401746981   |
| H110 | 10.1431663918  | 4.7186158834   | 1.8540257871   |
| H111 | 10.3267222541  | 2.9817029911   | 1.6463905568   |
| C112 | 8.3506269302   | 3.6253050733   | 2.2231436278   |
| H113 | 7.6796704305   | 4.4803417507   | 2.0459768419   |
| H114 | 8.5730315755   | 3.5945326519   | 3.2948754267   |
| N115 | 7.6773782283   | 2.3690247227   | 1.8809198136   |
| H116 | 7.7208919223   | 2.0508103271   | 0.9221685206   |
| C117 | 6.7915839930   | 1.7285657736   | 2.6790841206   |
| N118 | 6.4265764796   | 2.2772686709   | 3.8481854755   |
| H119 | 5.9567939648   | 1.6952807799   | 4.5471645050   |
| H120 | 6.4008179225   | 3.2767122034   | 3.9810450906   |
| N121 | 6.2911365549   | 0.5494130379   | 2.3205478692   |
| H122 | 6.8010837594   | -0.1791242240  | 1.7961408698   |
| H123 | 5.5643704825   | 0.1160543031   | 2.9091378931   |
| C124 | 11.8423976155# | -5.3930893898# | 7.2492548476#  |
| H125 | 11.2522023327# | -5.9724612982# | 6.5547079659#  |
| H126 | 12.7964628901# | -5.8524491732# | 7.4617421180#  |
| H127 | 12.0283933700  | -4.4006114679  | 6.8258920115   |
| C128 | 11.1473148486  | -5.3101172942  | 8.6221399990   |
| H129 | 11.8343503933  | -4.8440620790  | 9.3430061814   |
| H130 | 10.9723188887  | -6.3297020156  | 8.9917088984   |
| C131 | 9.8544078187   | -4.5603413530  | 8.6519204731   |
| N132 | 8.9717626653   | -4.6575416395  | 9.7238978077   |
| C133 | 9.2841412124   | -3.6512277150  | 7.8048010745   |
| H134 | 9.6259163522   | -3.2700811788  | 6.8601906715   |
| C135 | 7.9205446457   | -3.8466087575  | 9.5292954450   |
| H136 | 7.0834906743   | -3.6911618050  | 10.1924973560  |
| N137 | 8.0988715697   | -3.2258600171  | 8.3691124307   |
| H138 | 7.3871012379   | -2.5696897353  | 7.9417826570   |
| C139 | 6.0989350943#  | -4.2351883327# | -1.2221965988# |
| H140 | 5.3833635036#  | -4.5684339725# | -1.9592875012# |

|      |                |                 |                |
|------|----------------|-----------------|----------------|
| H141 | 7.1094170603#  | -4.1301812350#  | -1.5886718992# |
| H142 | 5.7971284917   | -3.2090354099   | -0.9724824956  |
| C143 | 6.0016752969   | -5.0580211463   | 0.0792499553   |
| H144 | 5.9801069391   | -6.1336147618   | -0.1223327371  |
| H145 | 6.8832788209   | -4.8452541402   | 0.6977676586   |
| C146 | 4.7635232265   | -4.6612083728   | 0.9076135654   |
| O147 | 4.7035310816   | -3.4575098041   | 1.3021469238   |
| O148 | 3.8823215145   | -5.5459829271   | 1.1528788535   |
| C149 | -1.8288745197# | -11.9867168076# | 4.2485689198#  |
| H150 | -2.3586934722# | -12.7180947960# | 3.6562999364#  |
| H151 | -2.3284067990# | -11.7832505795# | 5.1842336993#  |
| H152 | -0.8629235557  | -12.4344947494  | 4.5205244024   |
| C153 | -1.5915923491  | -10.6963205406  | 3.4260859757   |
| H154 | -2.4875232550  | -10.4845871544  | 2.8248158474   |
| H155 | -1.4647479455  | -9.8407592341   | 4.1002894004   |
| C156 | -0.3555525991  | -10.8033818070  | 2.5053708527   |
| H157 | 0.5469278748   | -10.6094502401  | 3.1015702936   |
| H158 | -0.2637480669  | -11.8409976955  | 2.1548097728   |
| C159 | -0.3671097504  | -9.9192975283   | 1.2430083907   |
| H160 | 0.5054261043   | -10.1641027910  | 0.6211089298   |
| H161 | -1.2466603355  | -10.1914876520  | 0.6430221159   |
| C162 | -0.4219072736  | -8.3979050302   | 1.4133062755   |
| H163 | -0.6329305619  | -7.9317574272   | 0.4467400526   |
| H164 | -1.2111155207  | -8.0952110099   | 2.1076226171   |
| N165 | 0.8451665420   | -7.7733374392   | 1.9042735032   |
| H166 | 0.8850434353   | -6.7550685019   | 1.5774975193   |
| H167 | 0.9133712209   | -7.7849090814   | 2.9401754282   |
| H168 | 1.7194711631   | -8.1832973997   | 1.5040091142   |
| C169 | -1.8652235680# | -2.8063900206#  | 9.6692397071#  |
| H170 | -2.8449960614# | -3.2600298660#  | 9.6435889744#  |
| H171 | -1.9204751988# | -1.8064530727#  | 10.0735581522# |
| H172 | -1.2534929159  | -3.3996298837   | 10.3650580453  |
| C173 | -1.2374578662  | -2.8369004454   | 8.2685998294   |
| H174 | -1.9042022408  | -2.2920836442   | 7.5825600320   |
| C175 | 0.1216482952   | -2.1349052649   | 8.2603811993   |
| H176 | 0.7993698178   | -2.5989051015   | 8.9880698448   |
| H177 | 0.0355209519   | -1.0715172268   | 8.5097313096   |
| H178 | 0.6011821709   | -2.1972681782   | 7.2798172638   |
| C179 | -1.1175893137  | -4.2785779046   | 7.7576946327   |
| H180 | -0.4637592414  | -4.8693852520   | 8.4143950667   |
| H181 | -0.6901155311  | -4.3107463554   | 6.7507385079   |
| H182 | -2.0932430531  | -4.7781896834   | 7.7277014701   |
| C183 | 0.9165892455   | -7.3954377890   | 5.0654547571   |
| O184 | 1.1514295752   | -1.6555771676   | 4.7596501348   |
| H185 | 0.8648846671   | -2.5853224228   | 4.8895299521   |
| O186 | 4.6884084989   | -1.1868241164   | 3.7926469040   |
| O187 | 7.0727286530   | -2.0501007819   | 1.8151421454   |
| H188 | 7.0011997213   | -2.1083883013   | 2.7858101082   |
| H189 | 6.2428720029   | -2.5008052387   | 1.5115901812   |
| O190 | -1.2185251837  | 1.0487121854    | 4.9262983309   |
| H191 | -1.2225484019  | 0.4012847839    | 4.1646600901   |
| H192 | -1.8920311560  | 0.7028660779    | 5.5320645260   |
| O193 | 2.8200962709   | 3.2506281933    | 8.5265433895   |
| H194 | 3.7035954028   | 3.4222580196    | 8.9072389121   |
| H195 | 2.4763030232   | 2.5227106504    | 9.0902656371   |
| O196 | 5.1683482447   | 2.4386519634    | 10.1791628584  |
| H197 | 5.1756484430   | 1.6329677194    | 9.6141858234   |
| H198 | 5.8564779029   | 2.2668710156    | 10.8499443491  |
| O199 | 2.5915796856   | -1.9519577060   | 2.3508114859   |
| H200 | 3.3433045429   | -2.5311472823   | 2.0349216758   |
| H201 | 0.3301004606   | -5.2585020809   | 4.6082527232   |
| O202 | 1.1417884909   | -5.4000666242   | 0.6988476331   |
| H203 | 2.1066257598   | -5.2597911712   | 0.8456769417   |
| H204 | 0.7026680712   | -4.5619699735   | 0.9828624950   |
| O205 | 0.1099468085   | -3.0736364781   | 1.8054165514   |
| H206 | 0.9736627388   | -2.5986952465   | 1.8900420548   |
| H207 | 0.0392789207   | -3.5289363040   | 2.6751791341   |
| O208 | 3.4385763060   | -8.2200918843   | 0.8751272184   |
| H209 | 3.6848674731   | -7.2573737355   | 0.8392513749   |
| H210 | 4.0736382105   | -8.6043210201   | 1.4973116264   |
| O211 | 0.5189889415   | -4.3426900165   | 4.3081573926   |
| H212 | 1.4934059907   | -4.3271836639   | 4.2331586688   |
| H213 | 9.0906462870   | -5.2590751329   | 10.5291880747  |
| O214 | 1.1188347865   | 0.5584153332    | 6.3766748396   |
| H215 | 0.3148478833   | 0.9055190576    | 5.9252238963   |



|      |                |               |                |
|------|----------------|---------------|----------------|
| H216 | 1.1644300956   | -0.3548576591 | 5.9994556322   |
| O217 | -1.0724014624  | -1.0361706994 | 3.3597597485   |
| H218 | -0.9595727926  | -1.4913445948 | 2.5020935150   |
| H219 | -0.2257093316  | -1.2490081191 | 3.8257511830   |
| C220 | -1.7679869892# | 8.2624199235# | 3.7031819997#  |
| C221 | -2.8675444441  | 7.1922439230  | 3.8682098021   |
| C222 | -2.5134862187  | 6.1440365748  | 4.8764056951   |
| C223 | -2.7567700994  | 6.3713119443  | 6.2603985654   |
| C224 | -1.9174305655  | 4.9286826443  | 4.4731201594   |
| C225 | -2.4236774522  | 5.4333954686  | 7.2029663197   |
| C226 | -1.5830282950  | 3.9620131650  | 5.3892665852   |
| C227 | -1.8215618657  | 4.1794051269  | 6.7984114663   |
| O228 | -1.5113734996  | 3.2739475276  | 7.6379443606   |
| H229 | -1.5549590912  | 8.7764870365  | 4.6457177601   |
| H230 | -3.0589199519  | 6.7219873368  | 2.8971529131   |
| H231 | -3.7962595993  | 7.6925692483  | 4.1699599354   |
| H232 | -3.2268322955  | 7.3041692841  | 6.5620979115   |
| H233 | -1.7417871020  | 4.7529124636  | 3.4149697605   |
| H234 | -2.6269463813  | 5.6050183493  | 8.2555714013   |
| H235 | -1.1809756252  | 2.9964628886  | 5.0953903688   |
| H236 | -2.1561200165# | 8.9921059994# | 2.9823580083#  |
| H237 | -0.8314439901# | 7.8582950237# | 3.3036159992#  |
| C238 | -1.2898930032# | 3.9433009920# | 14.6070429549# |
| C239 | -2.0837260713  | 4.8099942299  | 13.6191663663  |
| C240 | -1.5800199429  | 4.6002263695  | 12.2237351139  |
| N241 | -0.2554681717  | 4.8080517183  | 11.8445453804  |
| C242 | -2.1888454398  | 4.0878199406  | 11.1119886727  |
| C243 | -0.0778228593  | 4.4278526481  | 10.5664856889  |
| N244 | -1.2435586981  | 3.9889072158  | 10.1111476123  |
| H245 | -0.2640182317  | 4.3174554668  | 14.7179385811  |
| H246 | -2.0277816593  | 5.8701186189  | 13.8977415647  |
| H247 | -3.1443766519  | 4.5403630529  | 13.6317953603  |
| H248 | 0.4810915068   | 5.1582666248  | 12.4436984239  |
| H249 | -3.2093897298  | 3.7714575670  | 10.9636176256  |
| H250 | 0.8522726315   | 4.4440592270  | 10.0108002433  |
| H251 | -1.4107134590  | 3.6500551732  | 9.0981359389   |
| H252 | -1.7132030020# | 3.9091470052# | 15.6187189994# |
| H253 | -1.2165709866# | 2.9166759922# | 14.2394740243# |

### Structure of the large model including Tyr-His for the closed cubane:

|     |                |                |                |
|-----|----------------|----------------|----------------|
| Mn1 | 2.5739155046   | -1.4295117821  | 3.9125068338   |
| Mn2 | 4.6316125682   | -1.4040385139  | 8.4784534425   |
| Mn3 | 5.1951785226   | -1.4995252325  | 5.6476993166   |
| Mn4 | 6.6006631090   | 0.1764509588   | 7.4027084605   |
| O5  | 3.7876458842   | -1.3152849109  | 6.8820936149   |
| O6  | 5.6353738479   | 0.3262836811   | 5.9305800451   |
| O7  | 5.0799231324   | 0.3662469975   | 8.4052940357   |
| O8  | 6.1681775116   | -1.6778547756  | 7.4406424457   |
| Ca9 | 3.3237798322   | 1.3656988373   | 6.8380267112   |
| C10 | 0.6675457163#  | 1.9515068440#  | 1.7063484789#  |
| H11 | 1.2251836192#  | 1.9058034997#  | 0.7825776964#  |
| H12 | -0.3243893548# | 2.3686424770#  | 1.6143237458#  |
| H13 | 0.5146813332   | 0.9161086114   | 2.0267613625   |
| C14 | 1.4595829307   | 2.7050552356   | 2.8036971212   |
| H15 | 0.7888074384   | 3.3220201266   | 3.4146174981   |
| H16 | 2.1738737487   | 3.4172484195   | 2.3704518420   |
| C17 | 2.2448727973   | 1.8567282695   | 3.8202211093   |
| O18 | 2.8365182701   | 2.4705379488   | 4.7583140046   |
| O19 | 2.2347292596   | 0.5977544770   | 3.6841763122   |
| C20 | 1.0582599954#  | 1.1829959908#  | 13.4563133024# |
| H21 | 0.3702238584#  | 0.3601391333#  | 13.5824630996# |
| H22 | 0.7336467565#  | 2.1291271171#  | 13.8635785331# |
| H23 | 1.9450009236   | 0.9070960053   | 14.0456530305  |
| C24 | 1.4715606103   | 1.2667468357   | 11.9686195009  |
| H25 | 2.2631727006   | 2.0165011136   | 11.8386460731  |
| H26 | 0.6234821651   | 1.5873818580   | 11.3500669451  |
| C27 | 1.9826691569   | -0.0905714042  | 11.4540533218  |
| H28 | 1.1717573047   | -0.8328418609  | 11.4670672556  |
| H29 | 2.7579322139   | -0.4869584431  | 12.1208335880  |
| C30 | 2.5631223433   | -0.1031841201  | 10.0400165077  |
| O31 | 2.3808314333   | 0.8284604426   | 9.2399141348   |
| O32 | 3.2388780963   | -1.1770459394  | 9.7613821331   |
| C33 | 2.7844501730#  | -7.8608080679# | 8.6257438417#  |

|      |                |                |                |
|------|----------------|----------------|----------------|
| H34  | 2.5094637863   | -8.8163240547  | 9.0879411817   |
| H35  | 1.9374887074   | -7.5302816886  | 8.0172635746   |
| C36  | 4.0219166963   | -8.0691807544  | 7.7468473612   |
| O37  | 5.1566368548   | -8.2123838666  | 8.2575519010   |
| C38  | 3.0702006398   | -6.8426716563  | 9.7759919295   |
| H39  | 3.7297533542   | -7.3307299984  | 10.5038000189  |
| H40  | 2.1309949573   | -6.6233737639  | 10.2925486503  |
| C41  | 3.7047545909   | -5.5463581381  | 9.3395546927   |
| N42  | 4.9087534150   | -5.5743597735  | 8.6547815347   |
| H43  | 5.3838297748   | -6.4564468714  | 8.4248503361   |
| C44  | 3.3789924011   | -4.2101269681  | 9.4167770358   |
| H45  | 2.5286063695   | -3.7347559339  | 9.8761908370   |
| C46  | 5.2317547530   | -4.3293759784  | 8.2858432990   |
| H47  | 6.0350823582   | -4.0923381677  | 7.6161728805   |
| N48  | 4.3439964727   | -3.4612635146  | 8.7530996906   |
| N49  | 3.8223582133   | -7.9632930223  | 6.4262352940   |
| H50  | 2.8680874897   | -7.8321040625  | 6.0691707564   |
| C51  | 4.9172532185#  | -7.8463446898# | 5.4688659297#  |
| H52  | 4.5828162867   | -8.3070342642  | 4.5328635238   |
| H53  | 5.7644576853   | -8.4224836806  | 5.8483084124   |
| C54  | 5.3361632885   | -6.3795973877  | 5.2152845627   |
| H55  | 6.1990015622   | -6.3768067605  | 4.5369852314   |
| H56  | 5.6898610047   | -5.9533864515  | 6.1575404418   |
| C57  | 4.1885346574   | -5.5358204953  | 4.6388481945   |
| H58  | 3.2220201695   | -5.9458139050  | 4.9444045780   |
| H59  | 4.1755369071   | -5.5879343134  | 3.5404286479   |
| C60  | 4.1044867580   | -4.0573184757  | 4.9705063576   |
| O61  | 3.0094120819   | -3.4968359408  | 4.7599299548   |
| O62  | 5.1444119827   | -3.4383552341  | 5.4358233843   |
| C63  | 9.1595115851#  | 0.1191580027#  | 11.4478227818# |
| H64  | 9.8263013569   | -0.1576074909  | 10.6251002400  |
| H65  | 9.7157273804   | -0.0190051815  | 12.3845243688  |
| C66  | 7.9097483538   | -0.7638827168  | 11.4669795817  |
| H67  | 7.2262529849   | -0.4288768602  | 12.2529575875  |
| H68  | 8.1784705890   | -1.7986961204  | 11.7139295678  |
| C69  | 7.1189707390   | -0.7795251973  | 10.1551383525  |
| O70  | 7.6193090065   | -0.1401762491  | 9.1763026370   |
| O71  | 6.0492864935   | -1.4662519193  | 10.1451938661  |
| C72  | 8.7817049917   | 1.5988211184   | 11.3449018965  |
| O73  | 7.6768838696   | 2.0259784242   | 11.7020772372  |
| N74  | 9.7676573212   | 2.4223506879   | 10.9125351108  |
| H75  | 10.5926429676  | 2.0190161897   | 10.4894685057  |
| C76  | 9.5677770695#  | 3.8588145803#  | 10.7651884793# |
| H77  | 10.5240058416  | 4.3653386328   | 10.9087571185  |
| H78  | 8.8658406848   | 4.1765840783   | 11.5390173595  |
| C79  | 9.0617035425   | 4.2187558784   | 9.3495756903   |
| O80  | 9.8418567579   | 4.5183775477   | 8.4530858244   |
| N81  | 7.7054355353   | 4.1710007766   | 9.1990140060   |
| H82  | 7.1405850921   | 3.7558573689   | 9.9319871952   |
| C83  | 7.0735867566   | 4.3149979477   | 7.9016205017   |
| H84  | 6.3159920660   | 5.1041255983   | 7.9175294768   |
| H85  | 7.8619384550   | 4.5924419440   | 7.1947937952   |
| C86  | 6.3915534049   | 3.0218286003   | 7.4337771466   |
| O87  | 5.2240416737   | 3.0469942760   | 7.0213467126   |
| O88  | 7.1523485949   | 1.9711580832   | 7.5203485618   |
| C89  | 11.5816614298# | -0.6170834579# | 3.4808991950#  |
| H90  | 12.4441752089# | -1.2180927075# | 3.7284029821#  |
| H91  | 11.8304271182# | 0.3821370013#  | 3.1552080949#  |
| H92  | 11.1147719407  | -1.0985100666  | 2.6113120423   |
| C93  | 10.5448660389  | -0.4800818534  | 4.6233107214   |
| H94  | 10.1190034623  | 0.5291822863   | 4.5980671088   |
| H95  | 11.0221945851  | -0.5666023181  | 5.6062970001   |
| C96  | 9.3894597149   | -1.4773643603  | 4.4925128769   |
| H97  | 9.7032230843   | -2.4951614000  | 4.7721223564   |
| H98  | 9.0752860811   | -1.5649728075  | 3.4467937452   |
| C99  | 8.1285360638   | -1.1524296829  | 5.2867022494   |
| O100 | 7.0659842093   | -1.6808325314  | 4.8359646475   |
| O101 | 8.2263905809   | -0.4157785131  | 6.3261702674   |
| C102 | 10.8187240026# | 4.2285679404#  | -0.8150213857# |
| H103 | 11.5403644580# | 3.4839224650#  | -0.5131309488# |
| H104 | 11.2010928395# | 5.2306259495#  | -0.6882231194# |
| H105 | 10.6823481992  | 4.1039398330   | -1.8965683022  |
| C106 | 9.4674338959   | 3.9729962086   | -0.1100522309  |
| H107 | 8.9899510363   | 3.1077846627   | -0.5933554190  |
| H108 | 8.7918179540   | 4.8225512528   | -0.2789678658  |

|      |                |                 |                |
|------|----------------|-----------------|----------------|
| C109 | 9.5882252942   | 3.7101022914    | 1.4011393174   |
| H110 | 10.0946845600  | 4.5625282440    | 1.8729349251   |
| H111 | 10.2274412574  | 2.8351104661    | 1.5811667348   |
| C112 | 8.2605282107   | 3.5207559729    | 2.1566249845   |
| H113 | 7.5886518014   | 4.3631669486    | 1.9307564401   |
| H114 | 8.4616163483   | 3.5372926483    | 3.2324964631   |
| N115 | 7.5884063665   | 2.2445306922    | 1.8700407407   |
| H116 | 7.6330993569   | 1.8785138720    | 0.9281213965   |
| C117 | 6.7045855325   | 1.6455401722    | 2.7049335009   |
| N118 | 6.3454634202   | 2.2613656067    | 3.8464499152   |
| H119 | 5.8744816114   | 1.7129602056    | 4.5696515066   |
| H120 | 6.2995165154   | 3.2666239871    | 3.9143907008   |
| N121 | 6.1988834523   | 0.4473071421    | 2.4319700255   |
| H122 | 6.6800903574   | -0.3126718339   | 1.9166070972   |
| H123 | 5.4724231293   | 0.0636737707    | 3.0537329083   |
| C124 | 11.8423976305# | -5.3930893457#  | 7.2492548142#  |
| H125 | 11.2522023360# | -5.9724613121#  | 6.5547079747#  |
| H126 | 12.7964628803# | -5.8524491878#  | 7.4617421306#  |
| H127 | 12.0307219876  | -4.4007189186   | 6.8269231921   |
| C128 | 11.1637601494  | -5.3117426118   | 8.6273827911   |
| H129 | 11.8714237503  | -4.8788577925   | 9.3490685407   |
| H130 | 10.9578109401  | -6.3301471835   | 8.9837079575   |
| C131 | 9.9015223772   | -4.5182617820   | 8.6745873563   |
| N132 | 9.0249842698   | -4.6008511985   | 9.7515061130   |
| C133 | 9.3592671916   | -3.5779813127   | 7.8417434116   |
| H134 | 9.7074868861   | -3.1952769056   | 6.8977696846   |
| C135 | 8.0014930577   | -3.7525034211   | 9.5749003780   |
| H136 | 7.1596600657   | -3.5995095975   | 10.2322706965  |
| N137 | 8.1955156413   | -3.1203517749   | 8.4241091746   |
| H138 | 7.4818927509   | -2.4583557083   | 8.0043012223   |
| C139 | 6.0989350219#  | -4.2351883683#  | -1.2221965650# |
| H140 | 5.3833635248#  | -4.5684339644#  | -1.9592875255# |
| H141 | 7.1094170649#  | -4.1301812338#  | -1.5886718862# |
| H142 | 5.7932783203   | -3.2156369404   | -0.9530861988  |
| C143 | 6.0257268140   | -5.0897611460   | 0.0619419810   |
| H144 | 6.0153510620   | -6.1597353441   | -0.1683212672  |
| H145 | 6.9127704794   | -4.8824056035   | 0.6744150615   |
| C146 | 4.7941259666   | -4.7299133207   | 0.9126790383   |
| O147 | 4.7427853978   | -3.5446411400   | 1.3659450129   |
| O148 | 3.9063940824   | -5.6132198951   | 1.1180289157   |
| C149 | -1.8288744545# | -11.9867167426# | 4.2485689663#  |
| H150 | -2.3586934646# | -12.7180947568# | 3.6562998811#  |
| H151 | -2.3284068283# | -11.7832506181# | 5.1842336920#  |
| H152 | -0.8651499509  | -12.4384690515  | 4.5226089151   |
| C153 | -1.5823573459  | -10.6987268519  | 3.4284464735   |
| H154 | -2.4817295621  | -10.4696587031  | 2.8386819288   |
| H155 | -1.4320258812  | -9.8476609917   | 4.1035617293   |
| C156 | -0.3598745442  | -10.8269441456  | 2.4935161764   |
| H157 | 0.5530908404   | -10.6533460606  | 3.0800628928   |
| H158 | -0.2924800044  | -11.8647899527  | 2.1379545798   |
| C159 | -0.3703478951  | -9.9355194659   | 1.2376510698   |
| H160 | 0.4943133874   | -10.1862994225  | 0.6072030732   |
| H161 | -1.2581510846  | -10.1917255660  | 0.6427278937   |
| C162 | -0.4033933164  | -8.4155467622   | 1.4204126858   |
| H163 | -0.6030187657  | -7.9377148489   | 0.4571092403   |
| H164 | -1.1913693213  | -8.1073573111   | 2.1136916069   |
| N165 | 0.8699553176   | -7.8100580819   | 1.9194320299   |
| H166 | 0.9180045592   | -6.7955523999   | 1.5811863164   |
| H167 | 0.9373117026   | -7.8166399002   | 2.9555130828   |
| H168 | 1.7388675750   | -8.2332018049   | 1.5212858027   |
| C169 | -1.8652235672# | -2.8063900249#  | 9.6692396944#  |
| H170 | -2.8449960653# | -3.2600298576#  | 9.6435889775#  |
| H171 | -1.9204751963# | -1.8064530759#  | 10.0735581604# |
| H172 | -1.2607064918  | -3.3996175233   | 10.3719692382  |
| C173 | -1.2181632066  | -2.8426638625   | 8.2776304423   |
| H174 | -1.8602128432  | -2.2781365869   | 7.5842754204   |
| C175 | 0.1563148070   | -2.1696353600   | 8.2977124995   |
| H176 | 0.8008271361   | -2.6303793374   | 9.0574348379   |
| H177 | 0.0858346953   | -1.0987658464   | 8.5174054043   |
| H178 | 0.6665258305   | -2.2725293677   | 7.3358608236   |
| C179 | -1.1208712056  | -4.2823879285   | 7.7562401324   |
| H180 | -0.4840479164  | -4.8922346374   | 8.4120185408   |
| H181 | -0.6872345479  | -4.3146771644   | 6.7517301147   |
| H182 | -2.1060637856  | -4.7620068200   | 7.7142013636   |
| C183 | 0.9461398296   | -7.4050096414   | 5.0854061630   |

|      |                |               |                |
|------|----------------|---------------|----------------|
| O184 | 0.8890023780   | -1.6717061234 | 4.6767916328   |
| H185 | 0.6601290426   | -2.6157714270 | 4.8198429146   |
| O186 | 4.4601136760   | -1.1256256354 | 4.1316446022   |
| O187 | 7.0095677561   | -2.1072595956 | 1.8941570395   |
| H188 | 6.9323977556   | -2.1989304108 | 2.8617504251   |
| H189 | 6.2050075977   | -2.5966471308 | 1.5661768938   |
| O190 | -1.1510039899  | 1.0238604063  | 4.8009238395   |
| H191 | -1.1519228111  | 0.4491918856  | 3.9869750373   |
| H192 | -1.8520356095  | 0.6349859414  | 5.3467005133   |
| O193 | 2.7465687979   | 3.3635171667  | 8.7270034083   |
| H194 | 3.6462795789   | 3.5299334396  | 9.0677449781   |
| H195 | 2.4547989645   | 2.5854123792  | 9.2500992567   |
| O196 | 5.1769091973   | 2.4884158566  | 10.3007574971  |
| H197 | 5.1814792192   | 1.6955107599  | 9.7219646120   |
| H198 | 5.8773165005   | 2.3061444086  | 10.9566288641  |
| O199 | 2.4801992202   | -2.1745770474 | 2.2568495717   |
| H200 | 3.2706671845   | -2.7196344681 | 2.0002240666   |
| H201 | 0.2626816651   | -5.2861910127 | 4.5577656199   |
| O202 | 1.1530994272   | -5.4814824965 | 0.6465108707   |
| H203 | 2.1103727277   | -5.3133280960 | 0.8024874158   |
| H204 | 0.6806583031   | -4.6522670977 | 0.9074752551   |
| O205 | 0.0150181263   | -3.1852601187 | 1.6895913029   |
| H206 | 0.9032035678   | -2.7482889010 | 1.7704958712   |
| H207 | -0.0579003487  | -3.6412985002 | 2.5588988100   |
| O208 | 3.4553647445   | -8.2985931621 | 0.8805752681   |
| H209 | 3.7050030750   | -7.3379219411 | 0.8251429195   |
| H210 | 4.0742973762   | -8.6653538150 | 1.5290975081   |
| O211 | 0.4357441400   | -4.3837990473 | 4.2151060598   |
| H212 | 1.4145118316   | -4.3268407857 | 4.2363755265   |
| H213 | 9.1276372598   | -5.2222478351 | 10.5440318355  |
| O214 | 1.0641540168   | 0.4690027260  | 6.4435358720   |
| H215 | 0.3488625465   | 0.8813052091  | 5.9051098799   |
| H216 | 1.0496881093   | -0.4407631281 | 6.0615006133   |
| O217 | -1.1988823660  | -1.0112143885 | 3.1230593283   |
| H218 | -1.0300331268  | -1.5099238330 | 2.2990661321   |
| H219 | -0.4508587668  | -1.3078162678 | 3.6997607122   |
| C220 | -1.7679869918# | 8.2624198762# | 3.7031819941#  |
| C221 | -2.8506438567  | 7.1772940747  | 3.8784078500   |
| C222 | -2.4614513621  | 6.1329489417  | 4.8795736987   |
| C223 | -2.5847883189  | 6.4031315828  | 6.2721940384   |
| C224 | -1.9441021315  | 4.8858618840  | 4.4663215300   |
| C225 | -2.2115457070  | 5.4771657778  | 7.2105741437   |
| C226 | -1.5658220128  | 3.9304939730  | 5.3795031888   |
| C227 | -1.6835597841  | 4.1923804848  | 6.7966614874   |
| O228 | -1.3416784388  | 3.2995855663  | 7.6377549032   |
| H229 | -1.5526281263  | 8.7790279740  | 4.6439550677   |
| H230 | -3.0513786480  | 6.7069513863  | 2.9096922268   |
| H231 | -3.7822676389  | 7.6618278768  | 4.1983912412   |
| H232 | -2.9938502494  | 7.3608899029  | 6.5847040849   |
| H233 | -1.8610301795  | 4.6753186606  | 3.4032280435   |
| H234 | -2.3215972617  | 5.6853993882  | 8.2701985275   |
| H235 | -1.2126419951  | 2.9487412249  | 5.0711888466   |
| H236 | -2.1561200210# | 8.9921060028# | 2.9823580142#  |
| H237 | -0.8314439831# | 7.8582950385# | 3.3036160005#  |
| C238 | -1.2898930066# | 3.9433009839# | 14.6070429183# |
| C239 | -2.0638559961  | 4.8132684813  | 13.6063837665  |
| C240 | -1.5207222828  | 4.6138808967  | 12.2230959056  |
| N241 | -0.1870968515  | 4.8343988149  | 11.8830686858  |
| C242 | -2.0926833338  | 4.1041439046  | 11.0905892849  |
| C243 | 0.0309229299   | 4.4648689813  | 10.6077393604  |
| N244 | -1.1179314414  | 4.0200466152  | 10.1162501287  |
| H245 | -0.2622451359  | 4.3115859328  | 14.7244385644  |
| H246 | -2.0182643402  | 5.8718917915  | 13.8924663413  |
| H247 | -3.1235208025  | 4.5401533979  | 13.5898986660  |
| H248 | 0.5279525996   | 5.1902112917  | 12.5043533708  |
| H249 | -3.1063442709  | 3.7824333840  | 10.9098473309  |
| H250 | 0.9772614247   | 4.4844904955  | 10.0770660711  |
| H251 | -1.2521526312  | 3.6840404536  | 9.0946074456   |
| H252 | -1.7132030041# | 3.9091470104# | 15.6187189987# |
| H253 | -1.2165709757# | 2.9166759869# | 14.2394740413# |
